# Supplementary material
Source: PubMed Central journal article supplement (PMC3677943)
Supplement: NIHMS477872-supplement-supplement.pdf [file NIHMS477872-supplement-supplement.pdf]

Supporting Online Material for

**The Shaping of Modern Human Immune Systems by Multiregional  
Admixture with Archaic Humans**

Laurent Abi-Rached, Matthew J Jobin, Subhash Kulkarni, Alasdair McWhinnie,  
Klara Dalva, Loren Gragert, Farbod Babrzadeh, Baback Gharizadeh, Ma Luo,  
Francis A Plummer, Joshua Kimani, Mary Carrington, Derek Middleton,  
Raja Rajalingam, Meral Beksac, Steven GE Marsh, Martin Maiers, Lisbeth A Guethlein,  
Sofia Tavoularis, Ann-Margaret Little, Richard E Green, Paul J Norman and  
Peter Parham\*

\*To whom correspondence should be addressed. E-mail: [peropa@stanford.edu](mailto:peropa@stanford.edu)

**This PDF file includes**

Materials and Methods  
Figs. S1 to S26  
References

## TABLE OF CONTENTS (1)

### Materials and Methods

|                                                                                                                             |     |
|-----------------------------------------------------------------------------------------------------------------------------|-----|
| <u>Part I. <i>HLA-B*73</i></u>                                                                                              | p4  |
| I.1 Characterization of the <i>HLA-B*73:01</i> haplotype and of a chimpanzee allele of the <i>B*73</i> lineage              |     |
| I.2 Characterization of extended <i>MHC-B</i> gene sequences in hominoids                                                   |     |
| I.3 Sequencing and accession numbers                                                                                        |     |
| I.4 Sequence analysis of the <i>HLA-B*73:01</i> haplotype                                                                   |     |
| I.5 <i>MHC-BI-BII</i> divergence time analysis                                                                              |     |
| I.6 Distribution of <i>B*73</i> and <i>C*15:05</i>                                                                          |     |
| I.7 Estimation of the extent of linkage between <i>B*73:01</i> and <i>C*15:05</i>                                           |     |
| I.8 Haplotype data for population simulations                                                                               |     |
| I.9 Population simulations                                                                                                  |     |
| I.10 Parameters for population simulation                                                                                   |     |
| I.11 Note: explanation of <i>HLA</i> nomenclature                                                                           |     |
| I.12 Note: study approval                                                                                                   |     |
| <br>                                                                                                                        |     |
| <u>Part II. Analysis of the <i>HLA class I</i> content of the Denisova and Neandertal genomes</u>                           | p8  |
| II.1 Isolation and re-mapping of the Neandertal and Denisovan <i>HLA class I</i> sequence reads                             |     |
| II.2 Characterization of the Denisovan and Neandertal <i>HLA-A/-B/-C</i> content                                            |     |
| II.3 Distribution and diversity of Denisovan/Neandertal alleles and haplotypes                                              |     |
| II.4 Divergence time analyses for <i>HLA-A*11</i> , <i>C*12:02</i> and <i>C*15</i>                                          |     |
| II.5 Frequency of <i>HLA-A*02</i> , <i>A*11</i> and <i>A*24</i> in Asia                                                     |     |
| II.6 Note: long and ancient haplotypes shared between archaic and modern non-Africans are the products of archaic admixture |     |
| <br>                                                                                                                        |     |
| <u>Part III. <i>HLA class I</i> recombination rates and LD decay in four reference populations</u>                          | p12 |
| III.1 Estimation of <i>HLA class I</i> recombination rates                                                                  |     |
| III.2 Characterization of haplotypes with rapid LD decay                                                                    |     |
| III.3 Correlation between haplotypes with rapid LD decay and archaic alleles                                                |     |
| <br>                                                                                                                        |     |
| <u>Part IV. <i>KIR3DL1/S1</i> in the Denisova genome</u>                                                                    | p13 |
| <br>                                                                                                                        |     |
| <b>Supplemental References</b>                                                                                              | p14 |

## TABLE OF CONTENTS (2)

### Supplementary Figures

- Fig. S1. Simplified map of the *HLA class I* region.
- Fig. S2. Characterization of extended *MHC-B* gene sequences in hominoids.
- Fig. S3. Phylogenetic analysis of the segments forming the *HLA-B\*73:01* haplotype.
- Fig. S4. *HLA-B\*73* is the only remnant in modern humans of a deeply divergent allelic lineage.
- Fig. S5. Diversity of the *HLA-B* allele groups.
- Fig. S6. Models for the distribution of *HLA-B\*73*.
- Fig. S7. *HLA-C* characteristics of individuals with *HLA-B\*73*.
- Fig. S8. *HLA-B* allelic groups in the African populations that diverged before the Out-of-Africa migration.
- Fig. S9. *HLA-B\*73* and *HLA-C\*15:05* frequencies used for simulations.
- Fig. S10. Haplotype data used for the *B\*73* population simulations.
- Fig. S11. Results of *HLA-B\*73* population simulations.
- Fig. S12. Characterization of the two Denisovan *HLA-B* alleles.
- Fig. S13. Putative Denisovan *HLA-A-C* haplotype frequencies in modern populations.
- Fig. S14. Distribution of the Denisovan *HLA class I* alleles.
- Fig. S15. Emergence of *A\*11*, *C\*15* and *C\*12:02*.
- Fig. S16. Haplotype diversity of *A\*11*, *C\*15* and *C\*12:02*.
- Fig. S17. *HLA-A*, *B*, and *C* alleles of three Neandertals.
- Fig. S18. Modern populations with two high-frequency *HLA-C* alleles.
- Fig. S19. Putative Neandertal *HLA-A-C* haplotype frequencies in modern populations.
- Fig. S20. Allele frequency distributions for *HLA-A\*02* and *A\*26/\*66*.
- Fig. S21. Distribution of Neandertal *HLA class I* alleles.
- Fig. S22. Haplotype diversity of *B\*07:02/03/06*, *B\*51:01/08*, *C\*07:02*, and *C\*16:02*.
- Fig. S23. Enhanced *HLA class I* LD decay significantly correlates with archaic ancestry.
- Fig. S24. *HLA-C* alleles linked to *B\*73* when *C\*15* is absent.
- Fig. S25. Alleles associated with Denisovan/Neandertal-like haplotypes.
- Fig. S26. Population recombination rates for the *HLA class I* region.

## Supporting Online Material

### Materials and Methods

#### Part I. *HLA-B\*73*

**I.1 Characterization of the *HLA-B\*73:01* haplotype and of a chimpanzee allele of the *B\*73* lineage.** An Epstein-Barr virus-transformed B-cell line derived from a *HLA-B\*73:01* donor was used as source of genomic DNA for the construction of a cosmid library, using the SuperCos 1 Cosmid Vector Kit (Stratagene, Santa Clara, CA) per manufacturer's instructions. The library was screened with a <sup>32</sup>P-labeled *B\*73:01* cDNA probe, and hybridizing clones analyzed by end-sequencing and targeted amplification of *B\*73:01* using primers B\*73-Forward (5'-AACCGTCCTCCTGCTGCTC-3') and B\*73-Reverse (5'-GCGACCACAGCTACGGTGA-3'). One cosmid of ~38kb, which contained the complete *B\*73:01* gene, flanked by ~27kb of DNA at the 5' end and ~8kb at the 3' end, was selected for shotgun sequencing (TOPO Shotgun Subcloning Kit, Invitrogen, Carlsbad, CA).

Genomic DNA from a panel of 95 chimpanzees was typed by PCR specific for alleles of the *B\*73* lineage (*MHC-BII* lineage). PCR primers were TypeF (5'-GCTTAGATGAACATGAAAAGATAG-3') and TypeR (5'-TAGTTGATTGACATGTGGATTA-3').

**I.2 Characterization of extended *MHC-B* gene sequences in hominoids.** To compare the region of the *HLA-B\*73:01* haplotype that is directly derived from the second lineage of *MHC-B* alleles (*MHC-BII*), a region of ~8.5kb around the *MHC-B* gene was characterized in several common chimpanzees and gorillas, and one bonobo. Primers 8.5F (5'-GTCAGGACAAGAGGAACAGAGAAAC-3') and 8.5R (5'-GTTTCAGCACCAAGATCACTAGAACC-3') were used in chimpanzees and 8.5GorF (5'-GTCAGGAWAAGAGGAACAGAGAAAC-3') and 8.5R in gorillas. PCR products were isolated by gel electrophoresis, cloned into the pcr2.1-TOPO vector (Invitrogen) and clones from three independent amplifications were sequenced directly with specific overlapping primers.

In addition to these sequences, we used BAC clones to characterize a ~38kb gorilla haplotype carrying *Gogo-B\*06:01*, an ~8.5kb orangutan region carrying *Popy-B\*03:02*, and the *Popy-C\*02:02* gene. BAC clones carrying these genes were obtained by screening the NCBI trace archive database (<http://www.ncbi.nlm.nih.gov/Traces/>) for *MHC-B* gene-containing BAC clones. Clones 498J12 and 308J7 were isolated from the CHORI-277 gorilla library, together with clones 253H24 and 97B06 from the CHORI-276 orangutan library. Clones were shotgun-sequenced using a Genome Sequencer FLX (Roche/ 454 Life Sciences); samples were prepared and sequenced using the GS Titanium reagents per manufacturer's instructions. The ~6,900 reads we generated were assembled using MIRA (32) and the assembly edited with the GAP4 program of the STADEN package (33). The assembly was then supplemented by 63 sequence reads generated at the Wellcome Trust Sanger Institute as part of the gorilla reference genome

sequencing project. These data can be obtained from the NCBI Trace Archive (<http://www.ncbi.nlm.nih.gov/Traces/>). The assembly was further supplemented by three sequence reads generated by Washington University School of Medicine; these data were produced by the Genome Institute at Washington University School of Medicine in St. Louis and can be obtained from the NCBI Trace Archive (<http://www.ncbi.nlm.nih.gov/Traces/>). These 66 reads were obtained by BLAST search (34), using as probes the genomic segments with low coverage in our assembly. Those sequence reads that displayed a well-supported mismatch (i.e. a difference at a position with good quality in both directions) with sequence reads in our assembly, likely represented the other *MHC-B* haplotype and were not used. Finishing was performed by PCR amplifications on the two BAC clones and Sanger sequencing of the PCR products. The same approach was used for the orangutan analysis, but sequence reads were from the Washington University Genome Sequencing Center and Baylor College of Medicine (orangutan genome project (35)). The names of the animals used for the characterization of these sequences are given in figure S2.

**I.3 Sequencing and accession numbers.** Sequencing of the *B\*73* cosmid clone, the 8.5kb extended chimpanzee and gorilla *MHC-B* genes, as well as finishing for the gorilla and orangutan genomic segments characterized from BAC clones, used an ABI377 DNA sequencer (Applied Biosystems, Carlsbad, CA), a CEQ2000XL (Beckman), and McLab (South San Francisco, CA). Sequences were assembled with the STADEN package (33), and finished to high-quality standard: each base pair of the final assembly was minimally covered by three sequences representing two different templates and had a quality score >40-80 (error rate <1/10<sup>4</sup>-1/10<sup>8</sup>). Completed sequences were deposited in GenBank under accession numbers JF974053-70.

**I.4 Sequence analysis of the *HLA-B\*73:01* haplotype.** Haplotype and extended gene sequences were aligned with MAFFT (36) and corrected manually. Insertions of >100bp and unique to one sequence, to *MHC-C* or to macaque *MHC-B* sequences were excluded. The pattern of historical recombination in the region was investigated with the program RDP (37) and confirmed by Neighbor-Joining (NJ) analyses with MEGA4 (38) and alignment inspection. Following this analysis, the alignment was divided into 14 segments, which were each analyzed by three phylogenetic methods: maximum-likelihood (ML), NJ and parsimony. NJ analysis was performed with MEGA4 (38) using the Tamura-Nei method with 500 replicates. PAUP\*4.0b10 (39) and the tree bisection-reconnection branch swapping algorithm were used for parsimony analyses with 500 replicates and heuristic search. ML analyses were performed with RAXML7 (40) under the GTR+CAT model with 500 replicates (rapid bootstrapping).

**I.5 *MHC-BI-BII* divergence time analysis.** Mean and 95% credibility interval values for the divergence time between the *MHC-BI* and *MHC-BII* lineages were estimated using a Bayesian approach with the program MCMCTREE (v4.4c) from the PAML package (41). Analysis was conducted with an independent-rates molecular clock, the HKY85+ $\Gamma$  model of nucleotide substitution, on a ~4.4kb segment located 5' of the *MHC-B* gene

(segment #5 of figure S3), and used a ML tree topology (fig. S3). Several fossil calibration points were used for the following speciation events: human-chimpanzee, 6.5-10 million years ago (MYA) (42); gorilla-orangutan, >10MYA (43, 44); human-gorilla, >10MYA (45); human-Old World monkey 23-33.9MYA (42).

Priors for the transition/transversion rate ratio ( $\kappa$ ) and the shape parameter for gamma rates ( $\alpha$ ) were set as follows: means were estimated using the BASEML program of the PAML package (41) and SD were set so that prior SD would be about two times the posterior SD. Priors for the overall rate parameter ( $\mu$ ) and for the parameter  $\sigma^2$ , which specifies how variable the rates are across branches, were set as follows: prior means were set according to the posterior means and prior SD were set to be about four times the posterior SD. Step lengths used in the MCMC algorithm were set so that acceptance proportions were all in the interval 0.2-0.4. Three independent runs were conducted and in each case produced similar results.

**I.6 Distribution of *B\*73* and *C\*15:05*.** Allele frequencies for *B\*73* and *C\*15:05* were obtained from the Allele Frequency Net Database (12). Distribution maps were generated using the GMT software package (46) and a previously developed script (47). Only studies of more than 40 individuals were included: either anthropology studies or studies documenting the donors as unrelated. Data from bone marrow registries were excluded (unless frequencies were established on a group of randomly-selected donors), as well as data from admixed populations (for example African-Americans) or recent migrant populations for which the geographical origin was not well defined (for example 'USA Asian').

**I.7 Estimation of the extent of linkage between *B\*73:01* and *C\*15:05*.** *HLA-C\*15:05* was discovered as a novel *HLA-C* allele on a haplotype with *HLA-B\*73:01* (13). To determine how frequently *C\*15:05* and *B\*73* are on the same haplotype, we obtained data from anthropology studies and bone marrow registries (fig. S7). The former were directly obtained from the authors, while the latter were obtained with permission from the Bone Marrow Donors Worldwide (BMDW) and the National Marrow Donor Program (NMDP) organizations.

*HLA-B* and *-C* genotyping was performed to confirm the *B\*73* type of an African American *B\*73* donor using LABType<sup>®</sup> SSO reagents (One Lambda Inc, Canoga Park, CA) and detection by a Luminex 100 instrument (Luminex corp, Austin TX). High-resolution *HLA-C* typing was performed for five *B\*73* donors from the Anthony Nolan Trust using LABType<sup>®</sup> reagents. Eight unrelated *B\*73* donors from Ankara (Turkey) were genotyped for *HLA-B* and *-C* using Lifecodes typing kits (Tepnel Lifecodes, Stamford, CT). Six donors from Kenya and Tanzania were sequence-based genotyped for *HLA-B* and *-C*, as previously described (48). A further 120 *B\*73* donors from the Canadian OneMatch Stem Cell and Marrow Network were retyped at high resolution for *HLA-B* and *-C* using the AlleleSEQR *HLA* sequence-based typing (SBT) method (Atria Genetics, South San Francisco, CA), with additional tests using LABType<sup>®</sup> SSO reagents.

Because bone marrow registry data include low-resolution *HLA-C* typing, for the LD analysis (fig. S7) the *C\*15* alleles with no defined subtype were allocated to the *C\*15:05* or *C\*15:not05* groups based on the *C\*15:05/C\*15:not05* ratio, on a region-by-region basis. This approach allowed us to have an ‘Estimated *C\*15:05*’ category for each geographical region.

*HLA-C-B* haplotype structures were determined for 46 *B\*73*<sup>+</sup> individuals lacking *C\*15* using an implementation of the Expectation Maximization algorithm that accepts allelic ambiguities as inputs (49). Due to the small sample size, only *C-B* haplotypes containing *B\*73:01* with count >2 are provided.

**I.8 Haplotype data for population simulations.** The frequencies of *B\*73* and *C\*15:05* used in simulations were obtained as indicated above (section I.6), except that data for a few additional African populations were obtained from dbMHC (50) (lacking *B\*73* and *C\*15:05*, these populations were not included in the distribution maps); data are summarized in figure S9. Because anthropology studies commonly investigate a single locus (e.g. *HLA-B* or *HLA-C*), allele frequencies for both *B\*73* and *C\*15:05* are not always available from the same set of individuals. Thus, to prepare haplotype data for population simulation we used three steps to set the linkage between the *B* and *C* alleles according to the linkage data estimated from anthropology studies that investigated both loci and data from bone marrow donors (fig. S7). First, the total number of haplotypes and the number of *B\*73* haplotypes in the simulation were set to match the data observed in populations with *HLA-B* genotyping in west Asia or in Africa (fig. S9A). Second, the number of *C\*15:05* haplotypes in these *HLA-B* genotyped populations was calculated using the frequencies observed in *HLA-C* genotyped populations (fig. S9B), on a region-by-region basis. Finally, the extent of linkage between *B\*73* and *C\*15:05* was set according to linkage data summarized in figure S7 (on a region-by-region basis), but because of the heterogeneity in typing data and the possibility that some bone marrow donors represent related donors, we investigated nine models of linkage between *B\*73* and *C\*15:05* (fig. S10).

**I.9 Population simulations.** We compared two alternative models to explain how the *B\*73-C\*15:05* haplotypes were formed and propagated in western Asia and in Africa: a model of archaic admixture (Model ‘a’) and a model of African ancestry (Model ‘b’) (Fig. 1). Comparison of the models was conducted with the rejection-based approximate Bayesian inference and hypothesis testing software REJECTOR (16). In a first phase, simulated data were generated for each model using a coalescent simulation (51) based on the population demographic events, parameters (see Fig. 1 and section I.10) and haplotype data (fig. S10) supplied for each model. In a second phase, the simulated data were compared to the observed data and either ‘accepted’ or ‘rejected’; this process was repeated several million times.

To compare simulated and observed data, two summary statistics were used: ‘Derived Fraction’, which is the proportion of derived alleles present in the extant populations, and ‘LD’, the linkage disequilibrium measured as  $r^2$  (52). For each statistic, when the simulated values matched the observed values (with some tolerance) in both western Asia

and Africa, the iteration was considered a ‘single accept’; if an iteration produced ‘single accepts’ for both summary statistics, it was treated as a ‘double accept’. Because of the generally low frequencies of *B\*73* and *C\*15:05*, the tolerance for the ‘Derived Fraction’ statistic was set at 99% (i.e. a range of 0.01-1.99% is tolerated for an observed allele frequency of 1%) and at 50% for the ‘LD’ statistic. A test was also conducted with these two tolerance values halved (fig. S11B).

One model was considered to be significantly favored by the simulations when it gained >19 times the number of double accepts achieved by the alternative model (>95:5 ratio, 5% significance level).

**I.10 Parameters for population simulation.** For both models a and b, population sizes were considered under exponential growth with effective population sizes and growth rates derived from Pilkington et al. (53); recombination was set a 0.44cM/Mb (31). The Out-of-Africa migration was set at 3,375 generations ago (~67.5kya), without affecting the size of the African population, and a back-migration into Africa was set so that 10% of African ancestry traced back to western Asia, 500 generations ago (~10kya) (21). In both models, *C\*15:05* was formed in western Asia 3,250 generations ago (~65kya), so that the two models would only differ regarding where and when *B\*73* emerged: in western Asia 2,500 generations ago (~50kya) for model ‘a’ and in Africa 5,250 generations ago (~105kya) for model ‘b’.

**I.11 Note: explanation of HLA nomenclature.** *HLA* alleles are distinguished by a rational nomenclature (54) in which the name of the gene is followed by up to four sets of digits separated by colons. The digits before the first colon distinguish groups of alleles that roughly correspond to the serological types first used to define *HLA class I* polymorphisms. The next set of digits distinguishes subtypes that differ in their amino-acid sequences. Subsequent sets of digits distinguish alleles that differ by synonymous (third set) or intronic (fourth set) differences.

**I.12 Note: study approval.** This study was approved by the Stanford University administrative panels on human subjects in medical research and laboratory animal care.

## Part II. Analysis of the *HLA class I* content of the Denisova and Neandertal genomes

**II.1 Isolation and re-mapping of the Neandertal and Denisovan *HLA class I* sequence reads.** To investigate Denisovan (4) and Neandertal (3) *HLA class I* content, we downloaded from the UCSC Genome Browser website (<http://genome.ucsc.edu>) all sequence reads previously assembled to the human (hg18) and chimpanzee (panTro2) genomes. Using SAMTOOLS 0.1.12a (55), we extracted all reads within the coordinates chr6:28,810,000-33,500,000 of hg18 (127,562 reads) and chr6:30,978,159-34,115,302 of panTro2 (185,092 reads), corresponding to an interval including *TRIM27*, *KIFC1* and all classical *HLA/MHC* loci.

Re-mapping was conducted using a set of *HLA-A,-B,-C,-E,-F,-G* reference sequences (one sequence for each subtype), as well as sequences for the pseudogenes *HLA-H,-J,-K,-*



*L,-P,-S,-T,-U,-V,-W,-X,-Y* (10). Assembly of *HLA class I* from the Denisovan genome and the three Neandertal genomes was performed using MIRA (32). The contigs were investigated and edited using GAP4 of the STADEN package (33); only a single copy of the reads mapped both in the hg18 and panTro2 *MHC* regions was kept.

The Neandertal sequences presented a special problem for alignment because of errors characteristic of ancient DNA (3, 56), namely a high rate of C to T transitions at the 5' end of reads and an equally high rate of G to A transitions at the 3' end. Identifying relevant reads by sequence similarity searching was hampered by these ancient DNA associated base misincorporations. The Denisova sequence data suffered much less from this problem, because an enzymatic pre-treatment of the DNA (57) largely corrected the errors. To generate a more comprehensive list of relevant Neandertal reads, we re-mapped all the primary Neandertal data against the reference panel of *HLA class I* sequences using a custom mapper, *mia*, (available from the authors upon request) with the following command-line parameters: `-k 12 -N 500 -S 100`. This program incorporates the special position-specific error profile of these data into its scoring scheme for identifying and aligning sequences. Because it performs a full Smith-Waterman alignment this program is not hampered by insertion-deletion differences that can erode the sensitivity of heuristic aligners. With this approach 164 additional Neandertal sequences were identified from the original mapping to human and chimpanzee genomes.

**II.2 Characterization of the Denisovan and Neandertal *HLA-A/-B/-C* content.** Locus-specific screen: following re-mapping, we screened the assemblies to ensure all reads associated with *HLA-A,-B,* or *-C* were specific to that locus: each sequence read was compared to the reference *HLA class I* dataset (10) and any read shared with another locus was discarded. For reads having substitutions absent from the reference dataset, comparison to a larger dataset including all coding sequences (10) was conducted. If this approach failed to identify a sequence with the same SNP, BLAST was used (34) to examine *MHC class I* in other species. SNPs not represented in the known human and non-human primate *MHC class I* sequences (more than 6,800 sequences (10, 58)) were attributed to misincorporation errors made during PCR amplification of ancient DNA and ignored.

Allele-specific screen: *HLA-A,-B,* and *-C* allele content was determined for each archaic individual by comparing all locus-specific sequences to the reference panel of *HLA class I* sequences. For Neandertal *HLA-A/B/C* and Denisovan *HLA-A/C*, this analysis allowed the sequences to be split in three groups: sequences from the first allele, sequences from the second allele, and sequences that could come from either allele (which were discarded). For Denisovan *HLA-B*, at least one allele was novel, and to associate several reads to one allele or the other we used a parsimony approach to minimize differences with modern sequences (fig. S12).

The allele-specific sequences obtained for each gene and archaic human genome were compared to genomic and cDNA sequences from the corresponding gene of modern humans through pairwise comparisons, using MEGA4 (38). This analysis allowed a first assessment of Neandertal and Denisovan *HLA-A/B/C* content. This information was used

to design a second and more specific re-mapping to ensure capture of all the relevant sequence reads. For this reanalysis the initial set of reference *HLA-A/B/C* genomic sequences, which included one sequence for each of the allele groups, was increased to include all the available genomic sequences for the allele groups that we had determined were present in the Denisovan/Neandertal genomes. Following this remapping we used the same locus and allele-specific determination to refine the allele string.

### **II.3 Distribution and diversity of Denisovan/Neandertal alleles and haplotypes.**

Allele frequency data and distribution were investigated as described above (Section I.6). For the study of haplotype distributions, data were also obtained from dbMHC (50), and from Melanesian populations (59). *HLA* genotype phasing for the Melanesian populations was performed using PHASE 2.1 (60, 61).

Analysis of the diversity of *HLA* haplotypes carrying alleles of Denisovan/Neandertal origin was conducted using the same data sources as described above (12, 50). Because low-frequency haplotypes are not always reported in these databases, to investigate haplotype structures in Africa (where haplotypes carrying Denisovan *HLA-C* alleles are rare) we used data from a panel of ~2,400 African-American donors, for whom the haplotypes are well defined (62).

**II.4 Divergence time analyses for *HLA-A\*11*, *C\*12:02* and *C\*15*.** Estimation of the emergence times of *A\*11*, *C\*12:02* and *C\*15* was performed as described for the *B\*73* lineage (section I.5); specifics such as the datasets used or differences with the analysis described in section I.5 are given below for each allele. The phylogenetic tree topologies used for the divergence time analyses and presented in figure S15 were obtained using the methods described in section I.4.

For *HLA-A\*11*, a dataset of ~2.2kb representing the genomic segment between intron 3 and the 3'UTR of *HLA-A* was used, because this segment has not been a target for recombination (63). Divergence time analysis was conducted as indicated in section I.5, except that prior SD for the overall rate parameter ( $\mu$ ) and for the parameter  $\sigma^2$  were set to be about two times the posterior SD.

For *C\*15*, we used a dataset of ~3kb representing the complete *HLA-C* gene, except for two recombinant segments in exon 3 (64). For *C\*12:02*, we used a dataset of ~2.6kb representing a partial *HLA-C* gene sequence, with exon 2 and part of exon 3 excluded due to the presence of two gene conversion events. To avoid recombinants, a minimum number of sequences was used in these analyses. Divergence time analyses were conducted as described in section I.5, except that prior SD for the overall rate parameter ( $\mu$ ) was set to be about twice the posterior SD. The mean and SD priors for the parameter  $\sigma^2$  were also set to one divided by the root age (65), and the SD for the shape parameter for gamma rates ( $\alpha$ ) was set to the mean value. In both analyses, the root of the tree corresponds to the separation between humans and orangutans; in addition to a minimum bound of 10MYA (43, 44), a maximum bound of 18MYA was used to reflect the probable separation of orangutans from human/African apes after the African continent became combined with Eurasia (66).

**II.5 Frequency of *HLA-A\*02*, *A\*11* and *A\*24* in Asia.** To assess the overall frequencies of *HLA-A\*02*, *A\*11* and *A\*24* in Asia, we obtained *HLA* frequency data for 93 populations from 20 Asian countries representing >91% of the population of Asia. Frequencies in each country were defined as the median value for all considered populations. Using these median frequencies and the population size of each country (obtained from the Population Reference Bureau website, <http://www.prb.or>), we estimated the number of *A\*02*, *A\*11* and *A\*24* alleles in each country and, by integrating over all Asia, obtained the average frequency. *HLA* frequencies were obtained as indicated in section I.6, with one exception to avoid sampling bias. For Taiwan, data from aborigine populations was not included, as they represent only ~2% of the population of the country but have been extensively sampled and studied.

**II.6 Note: Long and ancient haplotypes shared between archaic and modern non-Africans are the products of archaic admixture.** Over time recombination breaks haplotypic associations, so that the longer two populations have been separated the shorter their shared haplotypes become. Consistent with this thesis, Green et al. (3) found in a genome-wide scan across 50kb windows only 13 regions for which there is a much deeper coalescence time separating non-African haplotypes than African haplotypes. The presence of these 13 long haplotypes could be explained by archaic admixture in non-Africans. For 10 of these regions, Neandertal sequences matched the deep clade unique to non-Africans, suggesting that when this haplotype configuration is observed, it is often the result of Neandertal admixture (3). Thus, in the genomes of non-Africans, deeply divergent haplotypes of more than >50kb deriving from African ancestry (as opposed to admixture) are seen to be very uncommon (3).

The Denisovan and Neandertal *HLA* haplotypes we characterized in this study follow the same pattern but have more dramatic features. For example, the haplotype formed by *A\*11* and either *C\*12:02* or *C\*15* is shared by Denisovans and modern Asian and Oceanian populations. This haplotype is more than eight times the size of the longest shared haplotype observed by Green et al in the genome-wide study (~1.3Mb vs ~160kb, respectively) (3). This *A\*11-C\*12:02* or *A\*11-C\*15* haplotype does not exist in Africa but carries allele groups whose formation predates the separation between archaic and modern humans. Similarly and more specifically, studies of isolated Amerindian populations show that *HLA class I* alleles are rapidly diversified by recombination (17, 18) so that long-term (>250ky) conservation of allele sequences or haplotype structures is not an expected feature of *HLA class I* evolution, despite strong balancing selection (67).

### Part III. *HLA class I* recombination rates and LD decay in four reference populations

**III.1 Estimation of *HLA class I* recombination rates.** Recombination rates were estimated in four populations (YRI, Yoruba (Nigeria); CEU, Europeans from Utah; CHB, Han Chinese; JPT, Japanese) using high-resolution phased SNP data (31). Three genomic intervals were analyzed for each population, *HLA-A-B*, *A-C* and *C-B*. For the *HLA-C-B* interval all SNP between the two loci were used (89-101 SNP; ~1SNP/kb), while for the *HLA-A-C* and *A-B* intervals, one of every five SNP was used (299-321 SNPs; ~1SNP/4.5kb). For each run of PHASE 2.1 (68, 69), we used the general model for recombination rate (-MR0), and sampling was performed for 500 iterations (thinning interval of 1) after a burn-in phase of 500 iterations; three independent runs were conducted for each population and interval. The run producing the best goodness-of-fit measure was retained (fig. S26). The population recombination rate ( $\rho$ ) for each interval was then converted to cM/Mb using an effective population size of 7,500 for the African population and 3,100 for the non-African populations (70).

**III.2 Characterization of haplotypes with rapid LD decay.** High-resolution genotyping has identified SNP markers that correlate with individual HLA alleles (31). We defined haplotypes with rapid LD decay as those where all the HLA-identifying SNPs ( $r^2 > 0.2$ ) occurred within 500kb of that *HLA* locus. This analysis was performed separately for each locus and population.

**III.3 Correlation between haplotypes with rapid LD decay and archaic alleles.** The correlation between archaic alleles and alleles defining haplotypes with rapid LD decay was studied using a binomial distribution: considering  $\Omega = (0, 1, 2, \dots, n)$ ,  $\forall k \in \Omega$ ,  $p = (X=k) = {}_n C_k * p^k * q^{n-k}$ .

This indicates for example that under a random distribution it is unlikely to have more than 28 of the 100 archaic alleles defining haplotypes with rapid LD decay, as the latter only represents 49 of the 231 haplotypes ( $\alpha = 0.05$ ); so the fact that 33 of the 100 archaic alleles define haplotypes with rapid LD decay indicates a biased distribution ( $\alpha = 0.0042$ ).

#### Part IV. *KIR3DL1/S1* in the Denisova genome

To investigate the *KIR3DL1/S1* content of the Denisova genome (4), we used the approach detailed in section II.1 for the *HLA class I* genes: all reads that had been mapped to the *KIR* locus of human (chr19:59,920,000-60,075,000) and chimpanzee (chr19:60,452,452-60,582,180) reference genomes were extracted and remapped to the variant *KIR* genomic sequences (71). *KIR3DL1* and *KIR3DS1* are alleles of the *KIR3DL1/S1* gene (24, 58). There were 405 reads that mapped exclusively to *3DL1/S1*, 66 of these reads identified *3DS1* (*3DS1\*013* closest known allele) and 76 identified *3DL1* (*3DL1\*005* closest known allele). Demonstrating two alleles were present, 41 nucleotide positions were heterozygous for *3DL1* and *3DS1* and these occurred throughout the 15kb genomic sequence of *3DL1/S1*.

Allele frequencies of *3DS1\*013* were obtained from 117 populations (12). Distribution maps were generated using the GMT software package (46), as indicated in section I.6.

## Supplemental References

32. B. Chevreur, T. Wetter, S. Suhai, *Computer Science and Biology: Proceedings of the German Conference on Bioinformaticss (GCB)* **99**, 45 (1999).
33. R. Staden, K. F. Beal, J. K. Bonfield, *Methods Mol. Biol.* **132**, 115 (2000).
34. S. F. Altschul *et al.*, *Nucleic Acids Research* **25**, 3389 (1997).
35. D. P. Locke *et al.*, *Nature* **469**, 529 (2011).
36. K. Katoh, K. Misawa, K. Kuma, T. Miyata, *Nucleic Acids Res.* **30**, 3059 (2002).
37. D. P. Martin, C. Williamson, D. Posada, *Bioinformatics* **21**, 260 (2005).
38. S. Kumar, K. Tamura, M. Nei, *Brief. Bioinform.* **5**, 150 (2004).
39. D. L. Swofford. (Sinauer, Sunderland, Massachusetts, 2001).
40. A. Stamatakis, *Bioinformatics* **22**, 2688 (2006).
41. Z. Yang, *Comput Appl Biosci* **13**, 555 (1997).
42. M. J. Benton, P. C. Donoghue, *Mol. Biol. Evol.* **24**, 26 (2007).
43. Y. Chaimanee *et al.*, *Nature* **427**, 439 (2004).
44. Y. Chaimanee *et al.*, *Nature* **422**, 61 (2003).
45. G. Suwa, R. T. Kono, S. Katoh, B. Asfaw, Y. Beyene, *Nature* **448**, 921 (2007).
46. P. Wessel, W. H. F. Smith, *Eos, Transactions, American Geophysical Union* **79**, 579 (1998).
47. O. D. Solberg *et al.*, *Hum. Immunol.* **69**, 443 (2008).
48. M. Luo *et al.*, *Tissue Antigens* **59**, 370 (2002).
49. C. Kollman *et al.*, *Hum Immunol* **68**, 950 (2007).
50. D. Meyer *et al.*, in *Immunobiology of the Human MHC: Proceedings of the 13th International Histocompatibility Workshop and Conference, Volume I*, J. A. Hansen, Ed. (IHWG Press, Seattle, WA, 2007), pp. 653-704.
51. G. Laval, L. Excoffier, *Bioinformatics* **20**, 2485 (2004).
52. W. G. Hill, A. Robertson, *TAG Theoretical and Applied Genetics* **38**, 226 (1968).
53. M. M. Pilkington *et al.*, *Mol Biol Evol* **25**, 517 (2008).
54. S. G. Marsh *et al.*, *Tissue Antigens* **75**, 291 (2010).
55. H. Li *et al.*, *Bioinformatics* **25**, 2078 (2009).
56. A. W. Briggs *et al.*, *Proc Natl Acad Sci U S A* **104**, 14616 (2007).
57. A. W. Briggs *et al.*, *Nucleic Acids Res* **38**, e87 (2010).
58. J. Robinson, K. Mistry, H. McWilliam, R. Lopez, S. G. Marsh, *Nucleic Acids Res* **38**, D863 (2010).
59. P. Main, R. Attenborough, G. Chelvanayagam, K. Bhatia, X. Gao, *Hum Biol* **73**, 365 (2001).
60. M. Stephens, P. Donnelly, *Am J Hum Genet* **73**, 1162 (2003).
61. M. Stephens, N. J. Smith, P. Donnelly, *Am J Hum Genet* **68**, 978 (2001).
62. M. Maiers, L. Gragert, W. Klitz, *Hum Immunol* **68**, 779 (2007).
63. M. Gleimer *et al.*, *J Immunol* **186**, 1575 (2011).
64. L. Sanz *et al.*, *Tissue Antigens* **47**, 329 (1996).
65. J. Inoue, P. C. Donoghue, Z. Yang, *Syst Biol* **59**, 74 (2010).
66. P. J. Waddell, D. Penny, in *Handbook of Human Symbolic Evolution*, A. Lock, C. R. Peters, Eds. (Oxford University Press, Oxford, 1996), pp. 53-73.

67. K. Gendzekhadze *et al.*, *Proc Natl Acad Sci U S A* **106**, 18692 (2009).
68. N. Li, M. Stephens, *Genetics* **165**, 2213 (2003).
69. D. C. Crawford *et al.*, *Nat Genet* **36**, 700 (2004).
70. A. Tenesa *et al.*, *Genome Res* **17**, 520 (2007).
71. C. W. Pyo *et al.*, *PLoS One* **5**, e15115 (2010).
72. T. Shiina *et al.*, *Genetics* **173**, 1555 (2006).
73. N. Lee, D. R. Goodlett, A. Ishitani, H. Marquardt, D. E. Geraghty, *J Immunol* **160**, 4951 (1998).
74. P. Parham *et al.*, *J Med Primatol* **39**, 194 (2010).
75. L. Abi-Rached, A. K. Moesta, R. Rajalingam, L. A. Guethlein, P. Parham, *PLoS Genet* **6**, e1001192 (2010).
76. L. Abi-Rached *et al.*, *J Immunol* **184**, 1379 (2010).
77. E. J. Adams, G. Thomson, P. Parham, *Immunogenetics* **49**, 865 (1999).
78. A. Mohyuddin, S. Q. Mehdi, *Tissue Antigens* **66**, 691 (2005).
79. M. Zetlaoui, *Ainsi vont les enfants de Zarathoustra : Parsis de l'Inde et Zartushtis d'Iran* (Imago 2003).
80. R. N. Koehler *et al.*, *PLoS One* **5**, e10751 (2010).
81. J. Tang *et al.*, *Exp Clin Immunogenet* **17**, 185 (2000).
82. J. N. Torimiro *et al.*, *Tissue Antigens* **67**, 30 (2006).
83. S. Farjadian *et al.*, *Tissue Antigens* **64**, 581 (2004).
84. D. Middleton *et al.*, *Hum Immunol* **61**, 1048 (2000).
85. S. A. Tishkoff *et al.*, *Science* **324**, 1035 (2009).
86. B. M. Henn *et al.*, *Proc Natl Acad Sci U S A* **108**, 5154 (2011).
87. J. Bruges Armas *et al.*, *Tissue Antigens* **62**, 233 (2003).

## Supporting Figures

Figure S1  
Simplified map of the *HLA class I* region

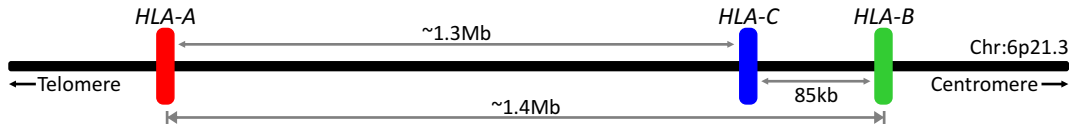

**Fig. S1.** Simplified map of the *HLA class I* region. Schematic representation of the location and distances between the *HLA-A*, *HLA-B* and *HLA-C* loci. *HLA* or *human leukocyte antigen* is the name given to the *Major Histocompatibility Complex (MHC)* in humans. *HLA* alleles are distinguished by a rational nomenclature (54) in which the name of the gene is followed by up to four sets of digits separated by colons. The digits before the first colon distinguish groups of alleles that roughly correspond to the serological types first used to define *HLA class I* polymorphisms. The next set of digits distinguishes subtypes that differ in their amino-acid sequences. Subsequent sets of digits distinguish alleles that differ by synonymous (third set) or intronic (fourth set) differences.



Figure S2  
 Characterization of extended *MHC-B* gene sequences in hominoids

**A**

|                                         | Individual           |                      | <i>MHC-B</i><br>allele |
|-----------------------------------------|----------------------|----------------------|------------------------|
|                                         | Species              | Name                 |                        |
| Extended<br>gene<br>sequence<br>(8.5kb) | Common<br>chimpanzee | Harry                | *05:01                 |
|                                         |                      | Miss Eve             | *09:01                 |
|                                         |                      | Phineas              | *18:01                 |
|                                         |                      | Renee                | *24:01                 |
|                                         |                      | Tank                 | *36:01                 |
|                                         |                      | Cheeta               | *38:01                 |
|                                         |                      |                      | *03:01                 |
|                                         | Bonobo               | Matata               | *17:01                 |
|                                         |                      |                      | *04:02                 |
|                                         |                      |                      | *07:01                 |
|                                         |                      |                      | *04:01                 |
|                                         |                      |                      | *07:01                 |
|                                         |                      |                      | *02:01                 |
|                                         |                      | *03:01               |                        |
|                                         | Orangutan            | Susie <sup>#</sup>   | *03:02                 |
| Haplotype<br>sequence<br>(38kb)         | Gorilla              | Kamilah <sup>#</sup> | *06:01                 |

**B**

| Chimpanzee | Allele of the <i>B*73</i> lineage | Source     |
|------------|-----------------------------------|------------|
| Cheeta     | Patr-B*17:01                      | Sequencing |
| Leslie     | Patr-B*17:01                      | Sequencing |
| Lindsey    | Patr-B*17:01                      | Filiation  |
| Fiona      | Patr-B*17:01                      | Filiation  |
| Ericka     | Patr-B*17:01                      | Sequencing |

**Fig. S2.** Characterization of extended *MHC-B* gene sequences in hominoids. **(A)** Chimpanzees, gorillas and orangutans from whom *MHC-B* extended gene or haplotype sequences were characterized. These sequences were named according to the *MHC-B* allele sequences they contain (IPD-MHC Database (58)). #, sequence determined from BAC DNA. **(B)** *Patr-B\*17:01* is a chimpanzee allele of the *B\*73* lineage (*MHC-BII*). Five chimpanzees from a panel of 95 tested were positive for *B\*73* lineage-specific PCR amplification. Sequencing or pedigree typing analysis showed all five individuals carried *Patr-B\*17:01*. *Patr-B\*17:01* from Cheeta and Leslie was sequenced in this study. Lindsey and Fiona inherited *Patr-B\*17:01* from their mother, Leslie, and the sequence of *Patr-B\*17:01* from Ericka was determined previously (72).

Figure S3  
Phylogenetic analysis of the segments forming the *HLA-B\*73:01* haplotype

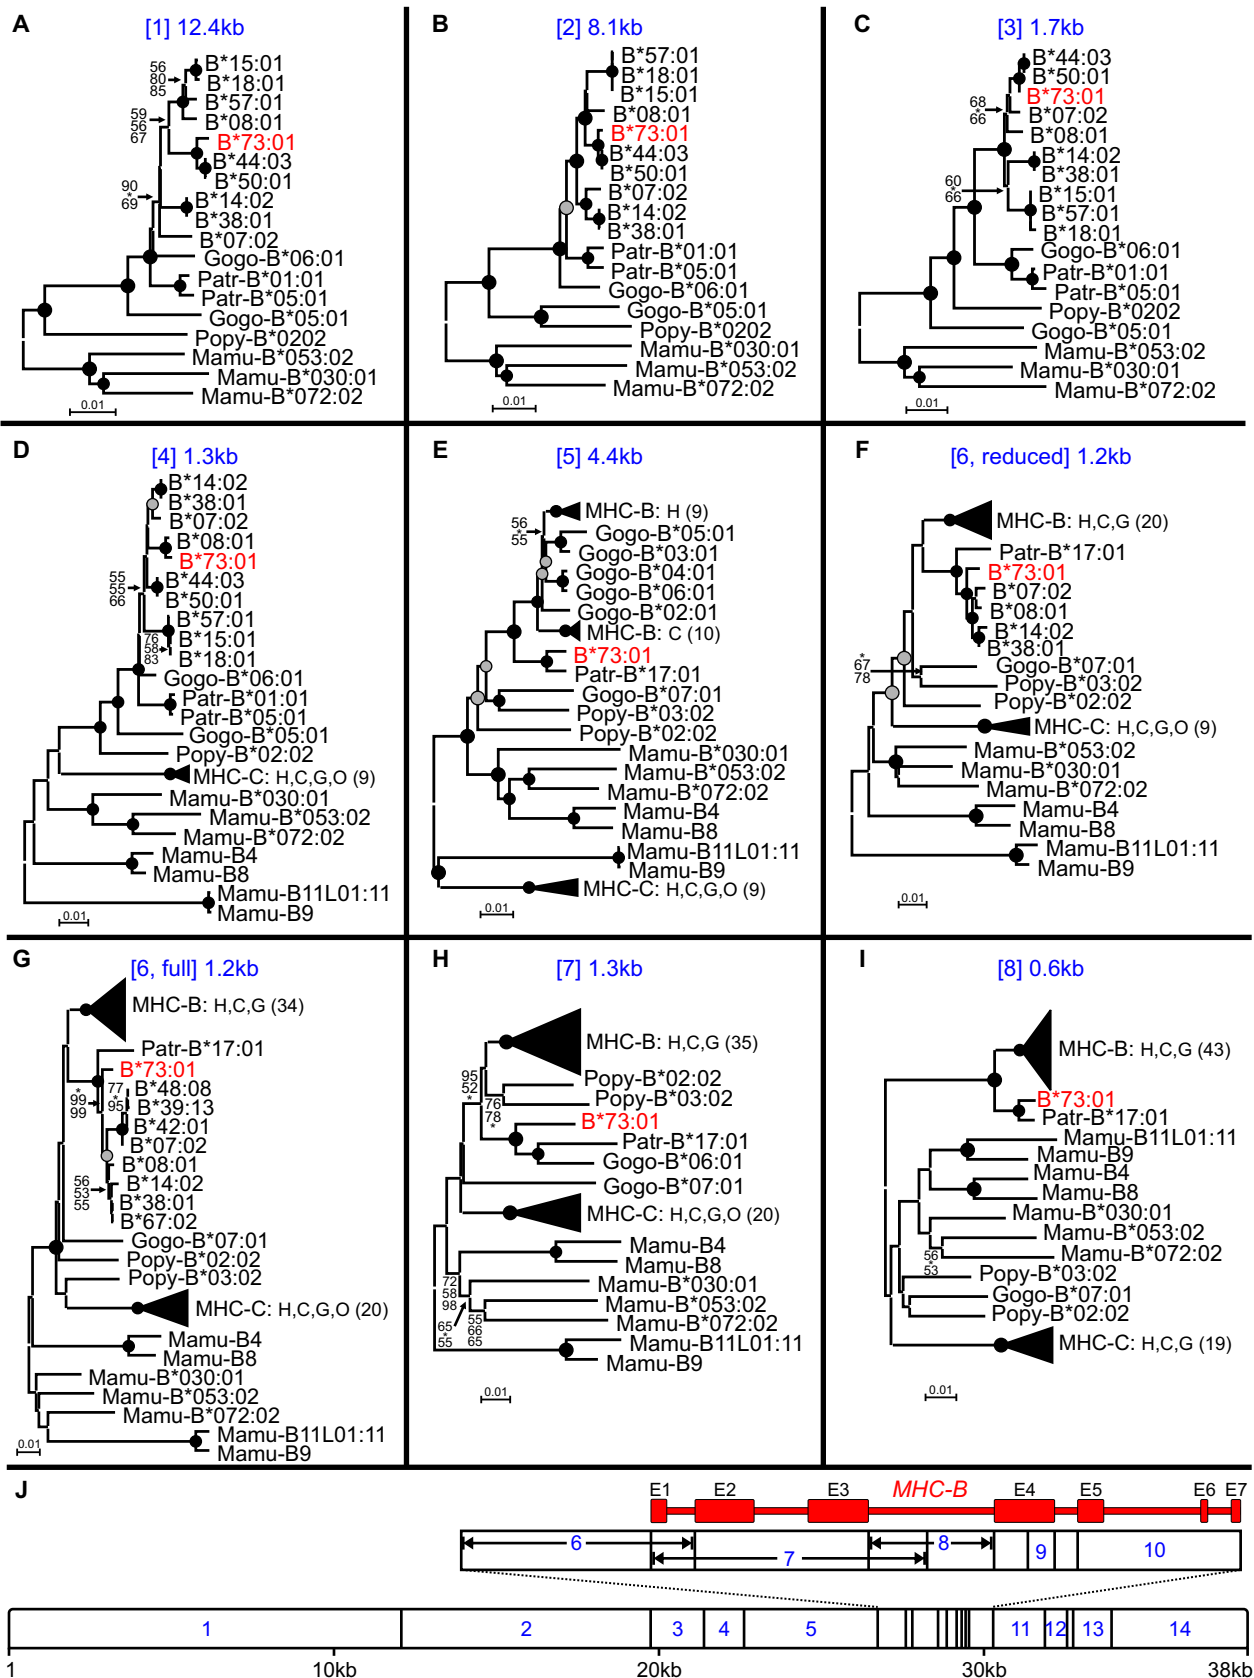

Figure S3  
Phylogenetic analysis of the segments forming the *HLA-B\*73:01* haplotype

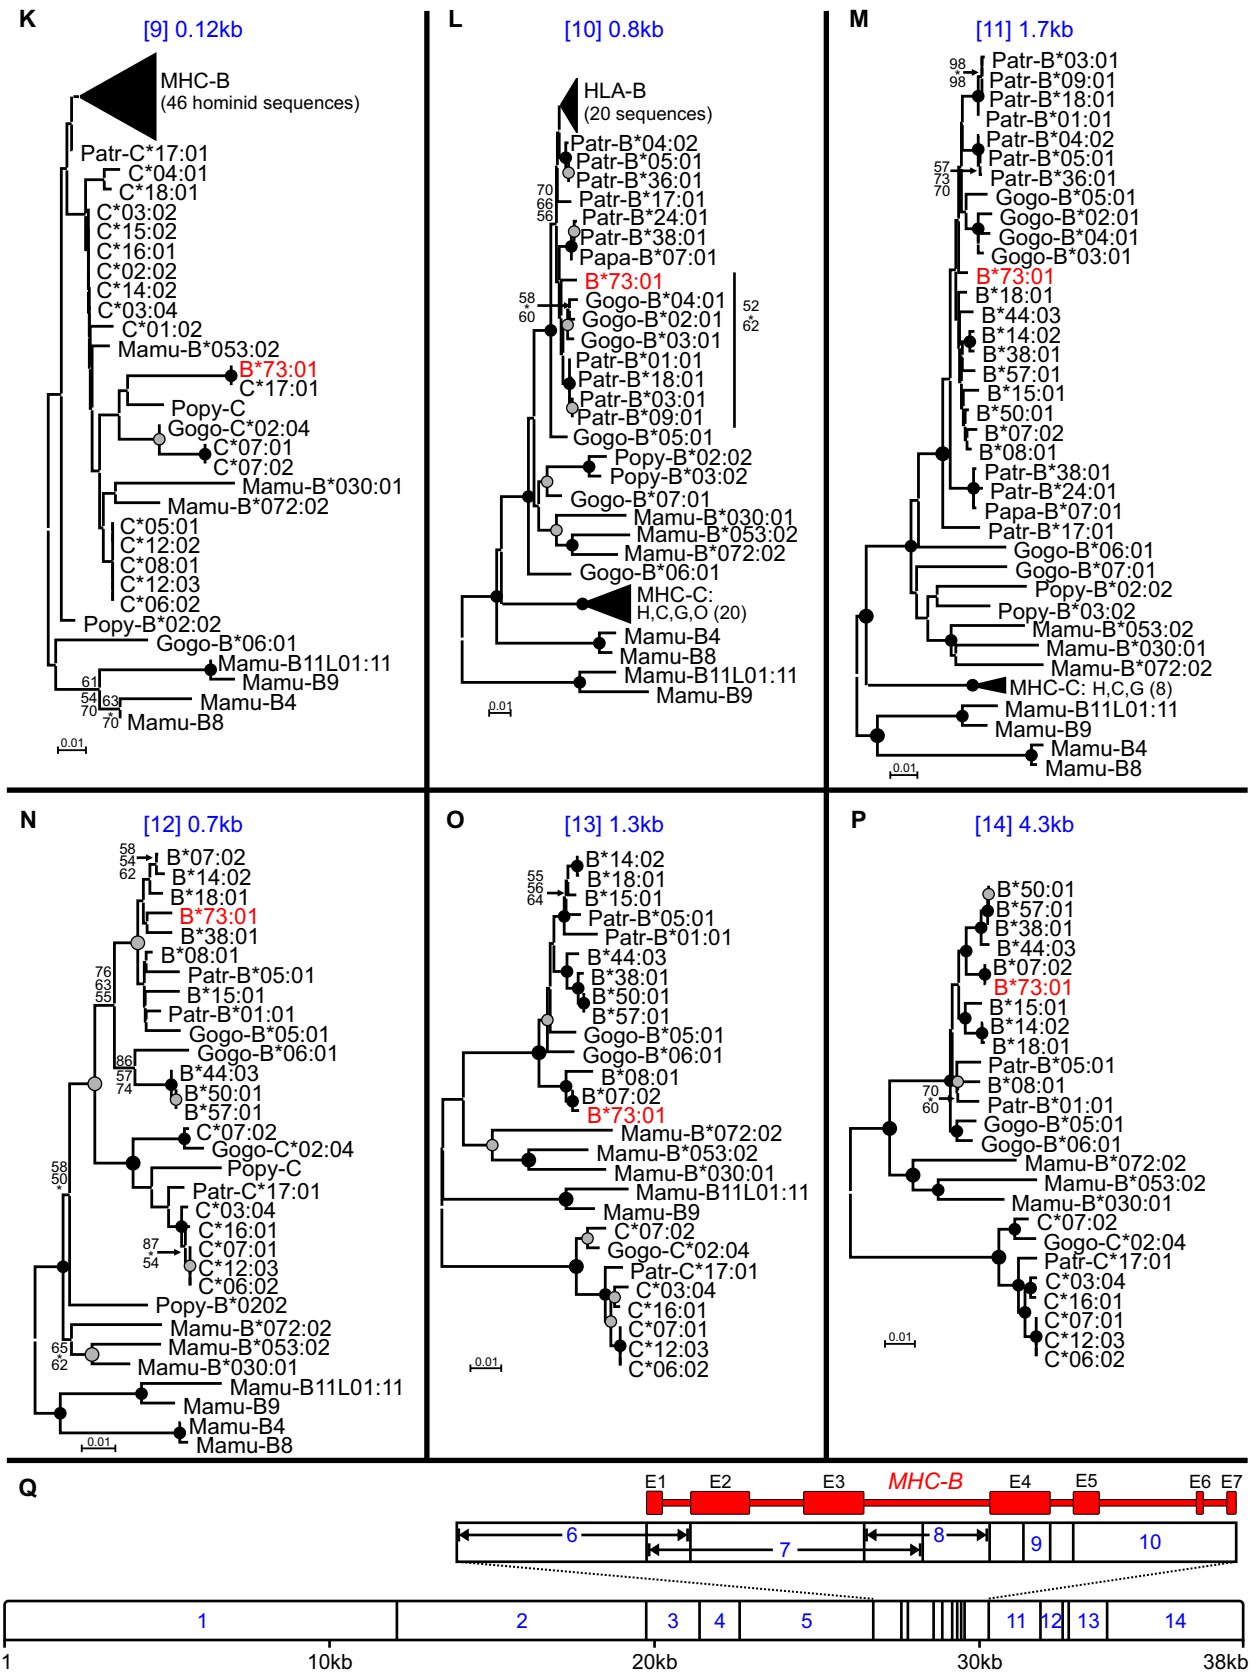

**Fig. S3.** Phylogenetic analysis of the segments forming the *HLA-B\*73:01* haplotype. (A-Q) Shown are phylogenetic reconstructions performed on each of 14 genomic segments (A-I, K-P). In blue at the top of each panel is shown the segment number (corresponds to the segments shown in panels (J, Q)) and its size. Analysis was performed using Maximum-Likelihood (ML), Neighbor-Joining (NJ) and parsimony with NJ tree topologies used for the display (midpoint rooting). Circles at nodes indicate strong (black) or moderate (grey) phylogenetic support, where bootstrap proportions from the three methods are  $\geq 80\%$  or  $\geq 60\%$ , respectively. Otherwise, bootstrap values are indicated when at least two methods gave  $\geq 50\%$  support (from top to bottom: NJ, parsimony, ML). To simplify the display some groups of *MHC-B* sequences were collapsed as indicated by black triangles: the number of sequences is given in parentheses together with the species composing the group (H, human; C, chimpanzees; G, gorilla; O, orangutan). Patr, *Pan troglodytes*; Papa, *Pan paniscus*; Gogo, *Gorilla gorilla*; Popy, *Pongo pygmaeus*; Mamu, *Macaca mulatta*.

## Figure S4

*HLA-B\*73* is the only remnant in modern humans of a deeply divergent allelic lineage

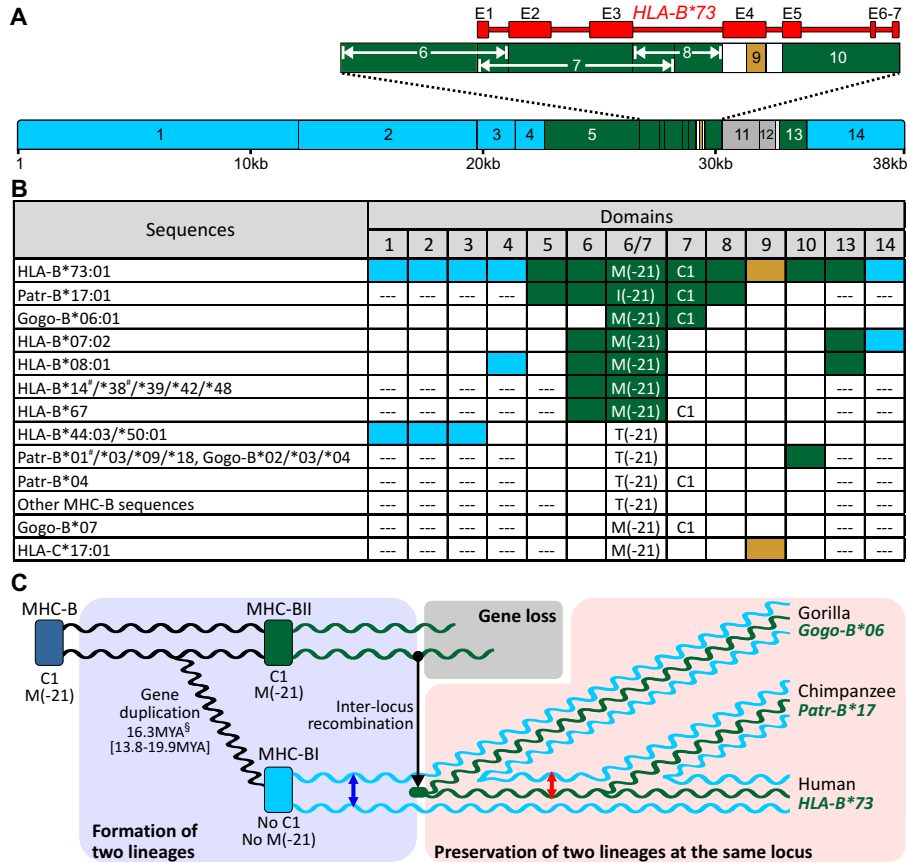

**Fig. S4.** *HLA-B\*73* is the only remnant in modern humans of a deeply divergent allelic lineage. (A) Phylogenetic analyses (fig. S3) show the *B\*73* haplotype contains segments most closely related to chimpanzee and gorilla *MHC-B* alleles (green) and flanking segments highly related to other *HLA-B* (blue) (brown segment is related to *HLA-C*). (B) Sequences with segments equivalent to those of *B\*73:01*. Some human alleles acquired *B\*73:01* segments by recombination. 'M(-21)' and 'C1' are functional characteristics in the leader peptide and  $\alpha 1$  domain, respectively. Presence of methionine at position -21 ensures the *HLA-B* leader peptide is processed and bound to *HLA-E*, a ligand for CD94:NKG2 natural killer (NK) cell receptors (73). M(-21) is associated with *MHC-BII* but not with the main lineage of *MHC-B* sequences (*MHC-BI*). Additionally, *MHC-BII* molecules have the C1 epitope (formed by valine 76 and asparagine 80 in the  $\alpha 1$  domain) which engages the KIR2DL2/3 NK cell receptors (74); in contrast a minority of *MHC-BI* molecules have C1 (75). ---, no sequence. #, complete sequence. (C) Model to explain how the sequence and functional divergence of *B\*73* emerged and was maintained, despite the high level of recombination at *MHC-B*. *B\*73*'s divergent core was formed >16 million years ago (MYA), suggesting this divergence is linked to the *MHC-B* gene duplications that occurred in early hominoids (76, 77). Accordingly, following duplication and divergence of *MHC-BI* and *BII*, one allele of *BII* recombined to the *BI* locus giving rise to the ancestor of *B\*73* and its gorilla and chimpanzee equivalents. Sequence divergence likely reduced intra-locus recombination of *BI-BII* lineages (red arrow) comparing to the high levels of *BI-BI* recombination (blue arrow), thus contributing to the long-term structural conservation of the *MHC-BII* allele at the *MHC-BI* locus. §, mean and 95% credibility interval.

**Figure S5**  
Diversity of the *HLA-B* allele groups

| <i>HLA-B</i> allele group | Number of specific HLA allotypes | Notes                               |
|---------------------------|----------------------------------|-------------------------------------|
| B*07                      | 124                              |                                     |
| B*08                      | 69                               |                                     |
| B*13                      | 46                               |                                     |
| B*14                      | 21                               |                                     |
| B*15                      | 221                              |                                     |
| B*18                      | 59                               |                                     |
| B*27                      | 79                               |                                     |
| B*35                      | 160                              |                                     |
| B*37                      | 28                               |                                     |
| B*38                      | 27                               |                                     |
| B*39                      | 63                               |                                     |
| B*40                      | 162                              |                                     |
| B*41                      | 18                               |                                     |
| B*42                      | 16                               |                                     |
| B*44                      | 127                              |                                     |
| B*45                      | 13                               |                                     |
| B*46                      | 27                               |                                     |
| B*47                      | 8                                |                                     |
| B*48                      | 25                               |                                     |
| B*49                      | 16                               |                                     |
| B*50                      | 13                               |                                     |
| B*51                      | 109                              |                                     |
| B*52                      | 23                               |                                     |
| B*53                      | 24                               |                                     |
| B*54                      | 24                               |                                     |
| B*55                      | 49                               |                                     |
| B*56                      | 31                               |                                     |
| B*57                      | 43                               |                                     |
| B*58                      | 33                               |                                     |
| B*59                      | 5                                |                                     |
| B*67                      | 3                                |                                     |
| B*73                      | 2                                | Second allotype: single observation |
| B*78                      | 7                                |                                     |
| B*81                      | 5                                |                                     |
| B*82                      | 3                                |                                     |
| B*83                      | 1                                | Uncommon recombinant                |

**Fig. S5.** Diversity of the *HLA-B* allele groups. The number of specific allotypes is given for each of the 36 *HLA-B* allele groups (from the IMGT-*HLA* Database, release 3.3.0 (10)). *B\*73:02* was identified in one person and is possibly resulting from mutation in that individual.

Figure S6  
Models for the distribution of *HLA-B\*73*

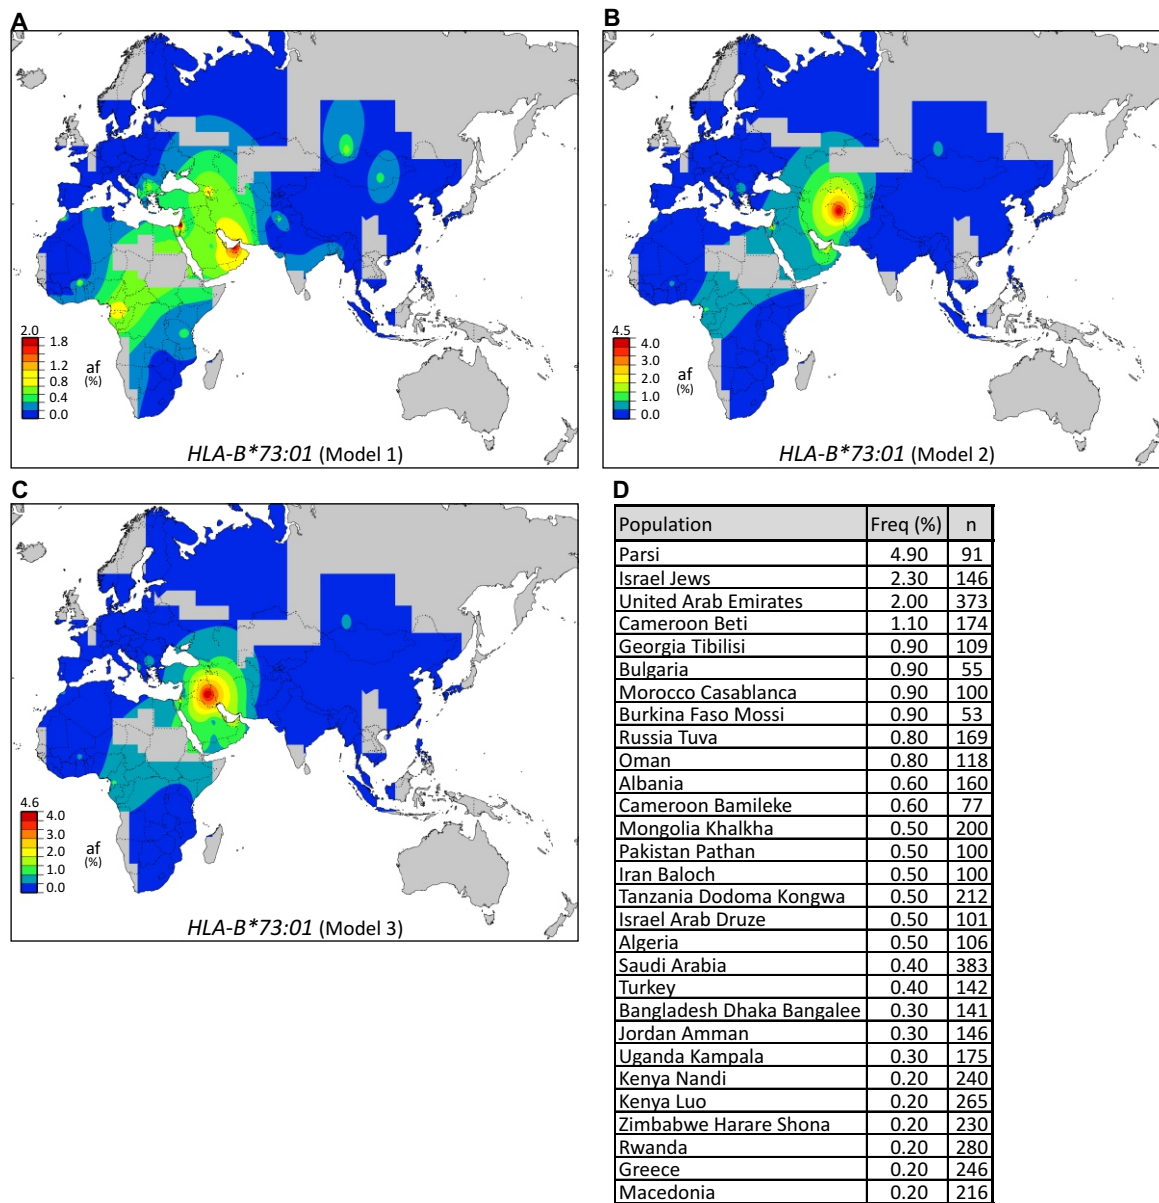

**Fig. S6.** Models for the distribution of *HLA-B\*73*. (A-D) Shown is the distribution of *B\*73* (A-C) and the *B\*73:01* allele frequency of all populations with *B\*73* (D). Because of uncertainty in the ancient geographical location of Parsis, the population with the highest *B\*73* frequency (12, 78) (D), we considered three models for the distribution of *B\*73* (A-C). While some Parsis now live in Pakistan, they represent a 'recent' migrant population from Persia (79) and are not included in model 1. Models 2 and 3 are based on two alternative hypotheses of Parsi origin. Model 2 uses the historical Greater Khorasan region as the point of origin of their migration (city of Nishapur, 58.8E 36.2N), as this region became a refuge for Zoroastrians following the fall of the Sasanian empire, and subsequent migration to India originated from this region (79). The Khorasan region was only a refuge for Zoroastrians who used to live in other regions of Persia however, so in Model 3 the Sasanian capital Ctesiphon (present-day Iraq, 44.62E 33.15N) is the point of origin of the migration.

Figure S7

HLA-C characteristics of individuals with HLA-B\*73

| Origin of the data<br>(individuals with HLA-B*73) |                           | Ethnicity        | HLA-C characteristics of individuals with B*73 |              |                 |                 |             |            |   |
|---------------------------------------------------|---------------------------|------------------|------------------------------------------------|--------------|-----------------|-----------------|-------------|------------|---|
|                                                   |                           |                  | n                                              | C*15 subtype |                 |                 | Not<br>C*15 |            |   |
|                                                   |                           |                  |                                                | :05          | Allele string   |                 |             |            |   |
|                                                   |                           |                  |                                                |              | includes<br>:05 | excludes<br>:05 |             | not<br>:05 |   |
| Bone<br>Marrow<br>Registries                      | USA-NMDP                  | Europe           | 2,158                                          | 1,271        | 853             | 6               | 4           | 24         |   |
|                                                   |                           | Western Asia     | 64                                             | 28           | 35              |                 |             | 1          |   |
|                                                   |                           | Western Asia**   | 6                                              | 1            | 5               |                 |             |            |   |
|                                                   |                           | N/S/E Asia       | 39                                             | 12           | 27              |                 |             |            |   |
|                                                   |                           | Africa           | 15                                             | 7            | 8               |                 |             |            |   |
|                                                   |                           | Africa*          | 49                                             | 12           | 36              |                 | 1           |            |   |
|                                                   |                           | Hispanic         | 228                                            | 73           | 154             |                 |             | 1          |   |
|                                                   | Other/unknown             | 470              | 198                                            | 268          |                 |                 | 4           |            |   |
|                                                   | Canada                    | Europe           | 98                                             | 95           |                 |                 |             | 3          |   |
|                                                   |                           | N/S/E Asia       | 7                                              | 6            |                 |                 |             | 1          |   |
|                                                   |                           | Western Asia     | 1                                              | 1            |                 |                 |             |            |   |
|                                                   |                           | Hispanic         | 1                                              | 1            |                 |                 |             |            |   |
|                                                   |                           | Africa*          | 1                                              | 1            |                 |                 |             |            |   |
|                                                   | UK -Anthony Nolan         | Other/unknown    | 12                                             | 11           |                 |                 |             | 1          |   |
|                                                   |                           | Europe           | 32                                             | 2            | 30              |                 |             |            |   |
|                                                   |                           | N/S/E Asia       | 4                                              |              | 4               |                 |             |            |   |
|                                                   |                           | Africa           | 5                                              | 1            | 4               |                 |             |            |   |
|                                                   |                           | Western Asia     | 7                                              | 1            | 6               |                 |             |            |   |
|                                                   | Italy                     | (Europe)         | 16                                             |              | 15              | 1               |             |            |   |
|                                                   |                           | UK-BBMR          | (Europe)                                       | 90           | 5               | 82              |             |            | 3 |
|                                                   |                           | USA-Gift of Life | (Europe)                                       | 86           |                 | 80              | 5           | 1          |   |
|                                                   |                           | France           | (Europe)                                       | 65           | 19              | 44              |             |            | 2 |
|                                                   |                           | Cyprus BMDR      | (Europe)                                       | 49           | 20              | 29              |             |            |   |
|                                                   |                           | Poland-DKMS      | (Europe)                                       | 21           | 6               | 14              |             |            | 1 |
|                                                   |                           | UK-Wales         | (Europe)                                       | 19           | 19              |                 |             |            |   |
|                                                   |                           | Belgium          | (Europe)                                       | 17           | 9               | 6               | 2           |            |   |
|                                                   |                           | Australia        | (Europe)                                       | 7            |                 | 6               |             |            | 1 |
|                                                   |                           | USA -UCLA        | (Europe)                                       | 7            | 2               | 5               |             |            |   |
|                                                   |                           | Norway           | (Europe)                                       | 6            | 1               | 5               |             |            |   |
|                                                   |                           | Spain            | (Europe)                                       | 5            |                 | 4               | 1           |            |   |
|                                                   |                           | Portugal         | (Europe)                                       | 3            |                 | 3               |             |            |   |
|                                                   |                           | Austria          | (Europe)                                       | 3            | 2               | 1               |             |            |   |
| Switzerland                                       |                           | (Europe)         | 2                                              |              | 2               |                 |             |            |   |
| Czechia-Central BMDR                              |                           | (Europe)         | 2                                              | 1            | 1               |                 |             |            |   |
| Poland-POLTransplant                              |                           | (Europe)         | 2                                              |              | 2               |                 |             |            |   |
| Ireland                                           |                           | Europe           | 2                                              |              | 2               |                 |             |            |   |
| Lithuania                                         |                           | (Europe)         | 1                                              |              | 1               |                 |             |            |   |
| Sweden                                            |                           | (Europe)         | 1                                              | 1            |                 |                 |             |            |   |
| Israel-Hadassah                                   |                           | (Western Asia)   | 1                                              |              | 1               |                 |             |            |   |
| Israel-Ezer Mizion                                |                           | (Western Asia)   | 3                                              |              | 2               |                 |             | 1          |   |
| Turkey#                                           |                           | (Western Asia)   | 21                                             | 4            | 15              |                 | 1           | 1          |   |
| Singapore                                         |                           | (Western Asia)   | 8                                              | 8            |                 |                 |             |            |   |
| Published<br>studies                              |                           | dbMHC            | N/S/E Asia                                     | 1            |                 | 1               |             |            |   |
|                                                   |                           |                  | Western Asia                                   | 6            | 1               |                 |             | 2          | 3 |
|                                                   | Africa                    |                  | 3                                              | 3            |                 |                 |             |            |   |
|                                                   | N/S/E Asia                |                  | 2                                              | 1            |                 |                 | 1           |            |   |
|                                                   | Hispanic                  | 1                | 1                                              |              |                 |                 |             |            |   |
|                                                   | Uganda -ref. 1            | Africa           | 1                                              | 1            |                 |                 |             |            |   |
|                                                   | Kenya/Tanzania -ref. 2    | Africa           | 1                                              | 1            |                 |                 |             |            |   |
|                                                   | Sudan -ref. 3             | Africa           | 6                                              | 6            |                 |                 |             |            |   |
|                                                   | African American -ref. 2  | Africa*          | 3                                              | 3            |                 |                 |             |            |   |
|                                                   | Rwanda -ref. 4            | Africa           | 1                                              | 1            |                 |                 |             |            |   |
|                                                   | Cameroon Bamileke -ref. 5 | Africa           | 1                                              | 1            |                 | 1               |             |            |   |
| Cameroon Beti -ref. 5                             | Africa                    | 1                | 1                                              |              |                 |                 |             |            |   |
| Parsi -ref. 6                                     | Africa                    | 4                | 4                                              |              |                 |                 |             |            |   |
| Parsi -ref. 6                                     | Western Asia              | 9                |                                                | 9            |                 |                 |             |            |   |
| Iran Baloch -ref. 7                               | Western Asia              | 1                | 1                                              |              |                 |                 |             |            |   |
| Oman -ref. 8                                      | Western Asia              | 1                | 1                                              |              |                 |                 |             |            |   |

**Fig. S7.** HLA-C characteristics of individuals with HLA-B\*73. To investigate how frequently the B\*73 haplotypes also carry the HLA-C\*15:05 allele, we summarized data available in the literature and obtained genotype data from a large number of bone marrow donors with B\*73. Parentheses in the 'Ethnicity' column indicate that no ethnicity data were available: the region where the bone marrow registry is located was used instead. 'Allele string', lower resolution HLA-typing data. \* African-American(s). \*\* West Asia or north African coast. # C\*15:05 and C\*15:22 could not be distinguished. References: dbMHC(50), ref. 1 (80), ref.2 (this study), ref. 3(12), ref. 4(81), ref. 5(82), ref. 6(78), ref. 7(83), ref. 8(84).



Figure S8  
*HLA-B* allelic groups in the African populations that diverged before the Out-of-Africa migration

|                                  |      | Populations |         |          |         |      |
|----------------------------------|------|-------------|---------|----------|---------|------|
|                                  |      | Hadza       | Khoisan | Mbenzele | Bakolas | Baka |
|                                  |      | n=44        | n=56    | n=36     | n=50    | n=10 |
|                                  |      | Ref. 1      | Ref. 2  |          | Ref. 3  |      |
| <i>HLA-B</i> alleles represented | B*07 | ■           | ■       | ■        | ■       | ■    |
|                                  | B*08 | ■           | ■       | ■        | ■       | ■    |
|                                  | B*13 | ■           | ■       | ■        | ■       | ■    |
|                                  | B*14 | ■           | ■       | ■        | ■       | ■    |
|                                  | B*15 | ■           | ■       | ■        | ■       | ■    |
|                                  | B*18 | ■           | ■       | ■        | ■       | ■    |
|                                  | B*27 | ■           | ■       | ■        | ■       | ■    |
|                                  | B*35 | ■           | ■       | ■        | ■       | ■    |
|                                  | B*37 | ■           | ■       | ■        | ■       | ■    |
|                                  | B*38 | ■           | ■       | ■        | ■       | ■    |
|                                  | B*39 | ■           | ■       | ■        | ■       | ■    |
|                                  | B*40 | ■           | ■       | ■        | ■       | ■    |
|                                  | B*41 | ■           | ■       | ■        | ■       | ■    |
|                                  | B*42 | ■           | ■       | ■        | ■       | ■    |
|                                  | B*44 | ■           | ■       | ■        | ■       | ■    |
|                                  | B*45 | ■           | ■       | ■        | ■       | ■    |
|                                  | B*46 | ■           | ■       | ■        | ■       | ■    |
|                                  | B*47 | ■           | ■       | ■        | ■       | ■    |
|                                  | B*48 | ■           | ■       | ■        | ■       | ■    |
|                                  | B*49 | ■           | ■       | ■        | ■       | ■    |
|                                  | B*50 | ■           | ■       | ■        | ■       | ■    |
|                                  | B*51 | ■           | ■       | ■        | ■       | ■    |
|                                  | B*52 | ■           | ■       | ■        | ■       | ■    |
|                                  | B*53 | ■           | ■       | ■        | ■       | ■    |
|                                  | B*54 | ■           | ■       | ■        | ■       | ■    |
|                                  | B*55 | ■           | ■       | ■        | ■       | ■    |
|                                  | B*56 | ■           | ■       | ■        | ■       | ■    |
|                                  | B*57 | ■           | ■       | ■        | ■       | ■    |
|                                  | B*58 | ■           | ■       | ■        | ■       | ■    |
|                                  | B*59 | ■           | ■       | ■        | ■       | ■    |
| B*67                             | ■    | ■           | ■       | ■        | ■       |      |
| B*73                             | ■    | ■           | ■       | ■        | ■       |      |
| B*78                             | ■    | ■           | ■       | ■        | ■       |      |
| B*81                             | ■    | ■           | ■       | ■        | ■       |      |
| B*82                             | ■    | ■           | ■       | ■        | ■       |      |
| B*83                             | ■    | ■           | ■       | ■        | ■       |      |

**Fig. S8.** *HLA-B* allelic groups in the African populations that diverged before the Out-of-Africa migration. *HLA-B* content is summarized for two Khoisan-speaking (Hadza and Khoisan) and three pygmy (Mbenzele, Bakolas and Baka) populations: separations between these populations and others represent the earliest splits between modern human populations (14, 85). Alleles groups colored green are present in more than one population, while those colored blue are present in only one of the five populations. References are: ref. 1 (86), ref. 2 (87) and ref. 3 (82).

## Figure S9

### *HLA-B\*73* and *HLA-C\*15:05* frequencies used for simulations

**A**

| Region                | Population                              | Frequency Data     |                            | Database   | Summary            |                            |                   |
|-----------------------|-----------------------------------------|--------------------|----------------------------|------------|--------------------|----------------------------|-------------------|
|                       |                                         | n<br>(individuals) | <i>B*73</i> n<br>(alleles) |            | n<br>(individuals) | <i>B*73</i> n<br>(alleles) | <i>B*73</i><br>AF |
| West<br>Asia          | Israel Ashkenazi and Non Ashkenazi Jews | 109                | 5                          | Both       | 1,232              | 27                         | 1.09              |
|                       | Israel Arab Druse                       | 100                | 1                          | Both       |                    |                            |                   |
|                       | Jordan Amman                            | 146                | 1                          | AFN        |                    |                            |                   |
|                       | Oman                                    | 121                | 2                          | Both       |                    |                            |                   |
|                       | Saudi Arabia pop 2                      | 383                | 3                          | AFN        |                    |                            |                   |
|                       | United Arab Emirates                    | 373                | 15                         | AFN        |                    |                            |                   |
| Africa                | Algeria pop 2                           | 106                | 1                          | AFN        | 4,503              | 25                         | 0.28              |
|                       | Burkina Faso Fulani                     | 49                 | 0                          | AFN        |                    |                            |                   |
|                       | Burkina Faso Mossi                      | 53                 | 1                          | AFN        |                    |                            |                   |
|                       | Burkina Faso Rimaibe                    | 47                 | 0                          | AFN        |                    |                            |                   |
|                       | Cameroon Bamileke                       | 77                 | 1                          | AFN        |                    |                            |                   |
|                       | Cameroon Beti                           | 174                | 4                          | AFN        |                    |                            |                   |
|                       | Cameroon Sawa                           | 13                 | 0                          | AFN        |                    |                            |                   |
|                       | Kenya Luo                               | 265                | 1                          | Both       |                    |                            |                   |
|                       | Kenya Nairobi Sex workers               | 1481               | 8                          | This study |                    |                            |                   |
|                       | Kenya Nairobi                           | 143                | 0                          | dbMHC      |                    |                            |                   |
|                       | Kenya Nandi                             | 240                | 1                          | Both       |                    |                            |                   |
|                       | Mali Bandiagara                         | 138                | 0                          | Both       |                    |                            |                   |
|                       | Morocco Casablanca                      | 100                | 2                          | AFN        |                    |                            |                   |
|                       | Morocco Nador Metalsa                   | 68                 | 0                          | Both       |                    |                            |                   |
|                       | Morocco Settat                          | 68                 | 0                          | dbMHC      |                    |                            |                   |
|                       | Rwanda                                  | 280                | 1                          | AFN        |                    |                            |                   |
|                       | Senegal                                 | 94                 | 0                          | dbMHC      |                    |                            |                   |
|                       | South African Zulu                      | 201                | 0                          | dbMHC      |                    |                            |                   |
|                       | Sudanese                                | 200                | 3                          | AFN        |                    |                            |                   |
|                       | Tunisia                                 | 100                | 0                          | AFN        |                    |                            |                   |
| Uganda Kampala        | 161                                     | 0                  | Both                       |            |                    |                            |                   |
| Uganda Kampala pop 2  | 175                                     | 1                  | AFN                        |            |                    |                            |                   |
| Zambia Lusaka         | 44                                      | 0                  | Both                       |            |                    |                            |                   |
| Zimbabwe Harare Shona | 226                                     | 1                  | Both                       |            |                    |                            |                   |

**B**

| Region                | Population                              | Frequency Data     |                               | Database | Summary            |                               |                      |
|-----------------------|-----------------------------------------|--------------------|-------------------------------|----------|--------------------|-------------------------------|----------------------|
|                       |                                         | n<br>(individuals) | <i>C*15:05</i> n<br>(alleles) |          | n<br>(individuals) | <i>C*15:05</i> n<br>(alleles) | <i>C*15:05</i><br>AF |
| West<br>Asia          | Israel Ashkenazi and Non Ashkenazi Jews | 94                 | 5                             | Both     | 504                | 29                            | 2.88                 |
|                       | Israel Arab Druse                       | 100                | 10                            | Both     |                    |                               |                      |
|                       | Lebanon                                 | 97                 | 1                             | AFN      |                    |                               |                      |
|                       | Saudi Arabia Guraiait and Hail          | 213                | 13                            | AFN      |                    |                               |                      |
| Africa                | Cameroon Bamileke                       | 77                 | 1                             | AFN      | 2,254              | 39                            | 0.87                 |
|                       | Cameroon Beti                           | 174                | 8                             | AFN      |                    |                               |                      |
|                       | Cameroon Sawa                           | 13                 | 0                             | AFN      |                    |                               |                      |
|                       | Kenya                                   | 113                | 1                             | Both     |                    |                               |                      |
|                       | Kenya Luo                               | 265                | 3                             | Both     |                    |                               |                      |
|                       | Kenya Nandi                             | 240                | 4                             | Both     |                    |                               |                      |
|                       | Mali Bandiagara                         | 129                | 0                             | Both     |                    |                               |                      |
|                       | Morocco Nador Metalsa                   | 73                 | 2                             | AFN      |                    |                               |                      |
|                       | South African Zulu                      | 96                 | 0                             | dbMHC    |                    |                               |                      |
|                       | Senegal Niokholo Mandenka               | 165                | 0                             | AFN      |                    |                               |                      |
|                       | Sudanese                                | 200                | 11                            | AFN      |                    |                               |                      |
|                       | Tunisia                                 | 100                | 3                             | AFN      |                    |                               |                      |
|                       | Uganda Kampala                          | 163                | 1                             | Both     |                    |                               |                      |
|                       | Uganda Kampala pop 2                    | 175                | 4                             | AFN      |                    |                               |                      |
| Zambia Lusaka         | 45                                      | 0                  | Both                          |          |                    |                               |                      |
| Zimbabwe Harare Shona | 226                                     | 1                  | Both                          |          |                    |                               |                      |

**Fig. S9.** *HLA-B\*73* and *HLA-C\*15:05* frequencies used for simulations. (A-B) *HLA-B\*73* (A) and *C\*15:05* (B) frequency data in African and west Asian populations were obtained from the Allele Frequency Net (AFN) website (12) or from dbMHC (50).

Figure S10  
Haplotype data used for the *B\*73* population simulations

| Region | Haplotypes         |                     |                    |                    |                              |                              |                              |                             |                              |                             |
|--------|--------------------|---------------------|--------------------|--------------------|------------------------------|------------------------------|------------------------------|-----------------------------|------------------------------|-----------------------------|
|        | Type               | Model 1:<br>LD 100% | Model 2:<br>LD 95% | Model 3:<br>LD 90% | Model 4:<br>LD 95% /<br>100% | Model 5:<br>LD 100%<br>/ 95% | Model 6:<br>LD 90% /<br>100% | Model 7:<br>LD 90% /<br>95% | Model 8:<br>LD 100%<br>/ 90% | Model 9:<br>LD 95% /<br>90% |
| W Asia | B*73-C*15:05       | 27                  | 26                 | 24                 | 26                           | 27                           | 24                           | 24                          | 27                           | 26                          |
|        | B*73-No C*15:05    | 0                   | 1                  | 3                  | 1                            | 0                            | 3                            | 3                           | 0                            | 1                           |
|        | No B*73-C*15:05    | 44                  | 45                 | 47                 | 45                           | 44                           | 47                           | 47                          | 44                           | 45                          |
|        | No B*73-No C*15:05 | 2,393               | 2,392              | 2,390              | 2,392                        | 2,393                        | 2,390                        | 2,390                       | 2,393                        | 2,392                       |
| Africa | B*73-C*15:05       | 25                  | 24                 | 23                 | 25                           | 24                           | 25                           | 24                          | 23                           | 23                          |
|        | B*73-No C*15:05    | 0                   | 1                  | 3                  | 0                            | 1                            | 0                            | 1                           | 3                            | 3                           |
|        | No B*73-C*15:05    | 53                  | 54                 | 55                 | 53                           | 54                           | 53                           | 54                          | 55                           | 55                          |
|        | No B*73-No C*15:05 | 8,928               | 8,927              | 8,926              | 8,928                        | 8,927                        | 8,928                        | 8,927                       | 8,926                        | 8,926                       |

**Fig. S10.** Haplotype data used for the *B\*73* population simulations. Haplotype data for the population simulations were generated for nine different models of linkage disequilibrium (LD) using the *B\*73* and *C\*15:05* allele frequencies of figure S9. For models 1-3, LD is set at the same percentage for both regions (Africa and west Asia), while for models 4-9, a different value is used for each region (west Asia/Africa).

Figure S11  
Results of *HLA-B\*73* population simulations

A

| Models     |                         | Observed parameters (*100) |      |       |       | Derived Fraction (DF) statistic (99% tolerance)       |       |                             |                 |                        |            |             |             |
|------------|-------------------------|----------------------------|------|-------|-------|-------------------------------------------------------|-------|-----------------------------|-----------------|------------------------|------------|-------------|-------------|
|            |                         |                            |      |       |       | Linkage Disequilibrium (LD) statistic (50% tolerance) |       |                             |                 | Range tolerated (*100) |            |             |             |
| Name       | LD (%)<br>W.Asia/Africa | DF1                        | DF2  | LD1   | LD2   | Double Accepts                                        |       | Runs<br>(/10 <sup>6</sup> ) | $\alpha$<br>(%) | DF1                    | DF2        | LD1         | LD2         |
|            |                         |                            |      |       |       | Number                                                | Ratio |                             |                 |                        |            |             |             |
| Ma1<br>Mb1 | 100 / 100               | 1.10                       | 0.28 | 37.34 | 31.86 | 14,823<br>85                                          | 174   | 10<br>10                    | 0.57            | 0.01-2.18              | 0.003-0.55 | 18.67-53.27 | 15.93-47.79 |
| Ma2<br>Mb2 | 95 / 95                 | 1.06                       | 0.27 | 34.55 | 29.34 | 7,132<br>44                                           | 162   | 5<br>5                      | 0.61            | 0.01-2.10              | 0.003-0.53 | 17.27-49.22 | 14.67-44.01 |
| Ma3<br>Mb3 | 90 / 90                 | 0.97                       | 0.26 | 29.29 | 25.87 | 6,104<br>44                                           | 139   | 5<br>5                      | 0.72            | 0.01-1.94              | 0.003-0.51 | 14.64-42.22 | 12.94-38.81 |
| Ma4<br>Mb4 | 95 / 100                | 1.06                       | 0.28 | 34.55 | 31.86 | 15,008<br>75                                          | 200   | 10<br>10                    | 0.50            | 0.01-2.10              | 0.003-0.55 | 17.27-50.48 | 15.93-47.79 |
| Ma5<br>Mb5 | 100 / 95                | 1.10                       | 0.27 | 37.34 | 29.34 | 7,301<br>35                                           | 209   | 5<br>5                      | 0.48            | 0.01-2.18              | 0.003-0.53 | 18.67-52.01 | 14.67-44.01 |
| Ma6<br>Mb6 | 90 / 100                | 0.97                       | 0.28 | 29.29 | 31.86 | 7,247<br>42                                           | 173   | 5<br>5                      | 0.58            | 0.01-1.94              | 0.003-0.55 | 14.64-45.22 | 15.93-47.79 |
| Ma7<br>Mb7 | 90 / 95                 | 0.97                       | 0.27 | 29.29 | 29.34 | 6,985<br>58                                           | 120   | 5<br>5                      | 0.82            | 0.01-1.94              | 0.003-0.53 | 14.64-43.96 | 14.67-44.01 |
| Ma8<br>Mb8 | 100 / 90                | 1.10                       | 0.26 | 37.34 | 25.87 | 6,404<br>41                                           | 156   | 5<br>5                      | 0.64            | 0.01-2.18              | 0.003-0.51 | 18.67-50.28 | 12.94-38.81 |
| Ma9<br>Mb9 | 95 / 90                 | 1.06                       | 0.26 | 34.55 | 25.87 | 6,409<br>37                                           | 173   | 5<br>5                      | 0.57            | 0.01-2.10              | 0.003-0.51 | 17.27-47.49 | 12.94-38.81 |

B

| Models     |                         | Observed parameters (*100) |      |       |       | Derived Fraction (DF) statistic (50% tolerance)       |            |                             |                 |                        |           |             |             |
|------------|-------------------------|----------------------------|------|-------|-------|-------------------------------------------------------|------------|-----------------------------|-----------------|------------------------|-----------|-------------|-------------|
|            |                         |                            |      |       |       | Linkage Disequilibrium (LD) statistic (25% tolerance) |            |                             |                 | Range Tolerated (*100) |           |             |             |
| Name       | LD (%)<br>W.Asia/Africa | DF1                        | DF2  | LD1   | LD2   | Double Accepts                                        |            | Runs<br>(/10 <sup>6</sup> ) | $\alpha$<br>(%) | DF1                    | DF2       | LD1         | LD2         |
|            |                         |                            |      |       |       | Number                                                | Ratio      |                             |                 |                        |           |             |             |
| Ma4<br>Mb4 | 95 / 100                | 1.06                       | 0.28 | 34.55 | 31.86 | 1,103<br>-                                            | ><br>3,309 | 10<br>30                    | <0.1            | 0.53-1.58              | 0.14-0.42 | 25.91-43.18 | 23.90-39.83 |

C

| Models       |                         | Simulation     |       |                             | $\alpha$<br>(%)             |
|--------------|-------------------------|----------------|-------|-----------------------------|-----------------------------|
|              |                         | Double Accepts |       | Runs<br>(/10 <sup>6</sup> ) |                             |
| Name         | LD (%)<br>W Asia/Africa | Number         | Ratio |                             | Runs<br>(/10 <sup>6</sup> ) |
| Ma4<br>Mb4   | 95 / 100                | 15,008<br>75   | 200   | 10<br>10                    | 0.497                       |
| Ma4_H<br>Mb4 | 95 / 100                | 1,660<br>75    | 2,354 | 0.09<br>10                  | 0.041                       |

**Fig. S11.** Results of *HLA-B\*73* population simulations. (A-C) Comparison of two competing models for the history of *B\*73*: archaic admixture (model a) or African origin (model b). Shown are the summary statistics obtained following simulations with both models using the parameters indicated at the left. ‘LD’ is linkage disequilibrium between the *HLA-B* and *HLA-C* alleles. Panel (A) shows simulations 1-9, the input data for which are detailed in figure S10, the central columns show the result and the columns at the right show the tolerated range. Panel (B) shows simulations with tolerance values halved. (C) Simulations using a novel model ‘Ma4\_H’, for which an already formed *B\*73-C\*15:05* haplotype is introduced by admixture.  $\alpha$ : confidence level to reject model ‘b’. (B-C) Because no significance difference was observed between the nine models of LD in the analyses of panel (A), Model 4 was used in these analyses as it best represents the observed *B\*73-C\*15* LD in Africa and west Asia (Fig. 1).

**Figure S12**  
**Characterization of the two Denisovan *HLA-B* alleles**

|                     | Model 1        |             | Model 2        |             | Model 3        |             | Model 4        |             |
|---------------------|----------------|-------------|----------------|-------------|----------------|-------------|----------------|-------------|
|                     | Modern Alleles | Differences |
| Denisova Allele 1   | B*35:63        | 4           | B*35:63        | 5           | B*35:63        | 0           | B*35:63        | 1           |
|                     | B*35:03:01     | 9           | B*35:03:01     | 10          | B*35:05:01     | 6           | B*35:05:01     | 7           |
|                     | B*35:05:01     | 10          | B*35:05:01     | 11          | B*35:01:22     | 7           | B*35:01:22     | 8           |
|                     | B*35:01:22     | 11          | B*52:01:01:01  | 11          | B*35:03:01     | 7           | B*35:03:01     | 8           |
|                     | B*35:02:01     | 11          | B*35:01:22     | 12          | B*35:08:01     | 7           | B*35:08:01     | 8           |
|                     | B*35:08:01     | 11          | B*35:08:01     | 12          | B*35:01:01:02  | 8           | B*35:01:01:02  | 9           |
|                     | B*52:01:01:01  | 11          | B*35:02:01     | 12          |                |             |                |             |
|                     |                |             | B*52:01:01:02  | 12          |                |             |                |             |
| Denisova Allele 2   | B*46:01:05     | 3           | B*15:01:01:01  | 4           | B*15:58        | 3           | B*15:58        | 4           |
|                     | B*15:01:01:01  | 3           | B*15:03:01     | 4           | B*15:17:01:01  | 4           | B*15:17:01:01  | 5           |
|                     | B*15:03:01     | 3           | B*15:11:01     | 4           | B*15:17:01:02  | 4           | B*15:17:01:02  | 5           |
|                     | B*15:11:01     | 3           | B*15:18:01     | 4           | B*15:01:01:01  | 5           | B*15:01:01:01  | 6           |
|                     | B*15:18:01     | 3           | B*15:66        | 4           | B*15:03:01     | 5           | B*15:03:01     | 6           |
|                     | B*46:01:01     | 3           | B*46:01:01     | 4           | B*15:11:01     | 5           | B*15:11:01     | 6           |
|                     | B*15:66        | 3           | B*46:01:05     | 4           | B*15:18:01     | 5           | B*15:18:01     | 6           |
|                     | B*15:07:01     | 4           | B*15:07:01     | 5           | B*15:66        | 5           | B*15:66        | 6           |
|                     | B*56:03        | 4           | B*56:03        | 5           | B*46:01:01     | 5           | B*46:01:01     | 6           |
|                     | B*15:108       | 5           | B*15:108       | 6           | B*46:01:05     | 5           | B*46:01:05     | 6           |
|                     | B*15:27:01     | 5           | B*15:32        | 6           | B*15:07:01     | 6           | B*15:07:01     | 7           |
|                     | B*15:32        | 5           | B*15:27:01     | 6           | B*56:03        | 6           | B*56:03        | 7           |
|                     | B*15:58        | 5           | B*15:58        | 6           | B*15:02:01     | 7           | B*15:13        | 8           |
|                     | B*15:02:01     | 6           | B*15:02:01     | 7           | B*15:108       | 7           | B*15:27:01     | 8           |
|                     | B*15:13        | 6           | B*15:13        | 7           | B*15:25:01     | 7           | B*15:02:01     | 8           |
|                     | B*15:17:01:01  | 6           | B*15:17:01:01  | 7           | B*15:32        | 7           | B*15:108       | 8           |
|                     | B*15:17:01:02  | 6           | B*15:17:01:02  | 7           | B*15:13        | 7           | B*15:25:01     | 8           |
| B*15:25:01          | 6              | B*15:25:01  | 7              | B*15:27:01  | 7              | B*15:32     | 8              |             |
| Minimum differences | 7              |             | 9              |             | 3              |             | 5              |             |

**Fig. S12.** Characterization of the two Denisovan *HLA-B* alleles. To analyze several Denisovan *HLA-B* sequence reads that could belong to either of the two alleles, we investigated all possible combinations and assessed the number of differences with modern alleles. The combination that produced the lowest number of differences with modern sequences (Model 3) is presented in the main text.

Figure S13

Putative Denisovan *HLA-A-C* haplotype frequencies in modern populations

|                                              | Denisovan <i>HLA class I</i> loci |              | Modern populations with haplotypes resembling the Denisovan <i>HLA class I</i> haplotypes |                                     |         |         |         |      |     |
|----------------------------------------------|-----------------------------------|--------------|-------------------------------------------------------------------------------------------|-------------------------------------|---------|---------|---------|------|-----|
|                                              | <i>HLA-A</i>                      | <i>HLA-C</i> | Name                                                                                      | Haplotype                           |         |         | HF      | n    |     |
|                                              |                                   |              |                                                                                           |                                     |         |         |         |      |     |
| Putative Denisovan <i>HLA-A-C</i> haplotypes | 1                                 | A*02         | C*15                                                                                      | Australia Kimberley aborigines      | A*02:01 | C*15:02 | B*40:02 | 8.3  | 24  |
|                                              |                                   |              |                                                                                           | Venezuela Sierra de Perija Yucpa    | A*02:04 | C*15:03 | B*52:01 | 5.8  | 73  |
|                                              |                                   |              |                                                                                           | Pakistan Sindhi                     | A*02    | C*15    | B*40    | 4.3  | 101 |
| Brazil Guarani-Nandewa                       |                                   |              |                                                                                           | A*02:01                             | C*15:03 | B*51:01 | 2.9     | 51   |     |
| Albania                                      |                                   |              |                                                                                           | A*02                                | C*15    | B*51    | 2.5     | 160  |     |
| Australia Yuendumu Aborigines                |                                   |              |                                                                                           | A*02:01                             | C*15:02 | B*40:02 | 2.5     | 190  |     |
| Venezuela Bari                               |                                   |              |                                                                                           | A*02:22                             | C*15:02 | B*51:01 | 2.2     | 23   |     |
| Venezuela Bari                               |                                   |              |                                                                                           | A*02:22                             | C*15:02 | B*51:04 | 2.2     | 23   |     |
| Venezuela Bari                               |                                   |              |                                                                                           | A*02:22                             | C*15:07 | B*52:01 | 2.2     | 23   |     |
| China Yunnan Hani                            |                                   |              |                                                                                           | A*02:03                             | C*15:02 | B*15:01 | 2.0     | 150  |     |
| Israel Druze                                 |                                   |              |                                                                                           | A*02:01                             | C*15:05 | B*07:02 | 2.0     | 100  |     |
| Taiwan Paiwan                                |                                   |              |                                                                                           | A*02:01                             | C*15:02 | B*40:01 | 2.0     | 51   |     |
| Brazil Guarani-Nandewa                       |                                   |              |                                                                                           | A*02:01                             | C*15:03 | B*51:04 | 2.0     | 51   |     |
| India New Delhi                              |                                   |              |                                                                                           | A*02:01                             | C*15:07 | B*40:06 | 1.9     | 53   |     |
| Brazil Guarani-Nandewa                       |                                   |              |                                                                                           | A*02:04                             | C*15:03 | B*51:04 | 1.8     | 51   |     |
| Papua New Guinea Goroka                      | A*02:06                           | C*15:02      | B*40:02                                                                                   | 1.6                                 | 32      |         |         |      |     |
| Brazil Guarani-Kaiowa                        | A*02:04                           | C*15:03      | B*51:04                                                                                   | 1.5                                 | 142     |         |         |      |     |
| Brazil Guarani-Kaiowa                        | A*02:01                           | C*15:03      | B*51:04                                                                                   | 1.2                                 | 142     |         |         |      |     |
| Finnish                                      | A*02:01                           | C*15:02      | B*51:01                                                                                   | 1.1                                 | 90      |         |         |      |     |
| American Samoa                               | A*02:01                           | C*15:05      | B*40:08                                                                                   | 1.0                                 | 50      |         |         |      |     |
| Taiwan Rukai                                 | A*02:01                           | C*15:02      | B*56:01                                                                                   | 1.0                                 | 50      |         |         |      |     |
| Israel Druze                                 | A*02:01                           | C*15:05      | B*44:02                                                                                   | 1.0                                 | 100     |         |         |      |     |
| Irish                                        | A*02:01                           | C*15:02      | B*51:01                                                                                   | 0.6                                 | 1000    |         |         |      |     |
| Putative Denisovan <i>HLA-A-C</i> haplotypes | 1                                 | A*11         | C*12:02                                                                                   | China Yunnan Hani                   | A*11:01 | C*12:02 | B*15:07 | 9.0  | 150 |
|                                              |                                   |              |                                                                                           | Taiwan Pazeh                        | A*11:02 | C*12:02 | B*27:04 | 8.2  | 55  |
|                                              |                                   |              |                                                                                           | India New Delhi                     | A*11:01 | C*12:02 | B*52:01 | 5.7  | 53  |
|                                              |                                   |              |                                                                                           | Papua New Guinea Haruai             | A*11:01 | C*12:02 | B*27:04 | 5.6  | 54  |
|                                              |                                   |              |                                                                                           | Taiwan Atayal                       | A*11:02 | C*12:02 | B*27:04 | 3.8  | 106 |
|                                              |                                   |              |                                                                                           | Papua New Guinea Madang             | A*11:01 | C*12:02 | B*27:04 | 3.7  | 54  |
|                                              |                                   |              |                                                                                           | China Yunnan Han                    | A*11:02 | C*12:02 | B*27:04 | 3.5  | 101 |
|                                              |                                   |              |                                                                                           | Philippines Ivatan                  | A*11:02 | C*12:02 | B*15:25 | 3.0  | 50  |
|                                              |                                   |              |                                                                                           | Taiwan Yami                         | A*11:02 | C*12:02 | B*27:04 | 3.0  | 50  |
|                                              |                                   |              |                                                                                           | Israeli Jews                        | A*11:01 | C*12:02 | B*52:01 | 3.0  | 67  |
|                                              |                                   |              |                                                                                           | Taiwan Siraya                       | A*11:02 | C*12:02 | B*27:04 | 2.9  | 51  |
|                                              |                                   |              |                                                                                           | Taiwan Siraya                       | A*11:02 | C*12:02 | B*40:02 | 2.9  | 51  |
|                                              |                                   |              |                                                                                           | Taiwan Puyuma                       | A*11:02 | C*12:02 | B*27:04 | 2.7  | 50  |
|                                              |                                   |              |                                                                                           | China Yunnan Bulang                 | A*11:01 | C*12:02 | B*15:07 | 2.5  | 116 |
|                                              |                                   |              |                                                                                           | Papua New Guinea Wosera             | A*11:01 | C*12:02 | B*27:04 | 1.6  | 95  |
| Russia Tuva                                  | A*11:01                           | C*12:02      | B*52:01                                                                                   | 1.5                                 | 166     |         |         |      |     |
| Papua New Guinea Wosera                      | A*11:01                           | C*12:02      | B*39:01                                                                                   | 1.1                                 | 95      |         |         |      |     |
| Taiwan Ami                                   | A*11:02                           | C*12:02      | B*27:04                                                                                   | 1.0                                 | 98      |         |         |      |     |
| Philippines Ivatan                           | A*11:02                           | C*12:02      | B*27:04                                                                                   | 1.0                                 | 50      |         |         |      |     |
| Putative Denisovan <i>HLA-A-C</i> haplotypes | 2                                 | A*11         | C*15                                                                                      | Taiwan Puyuma                       | A*02:06 | C*12:02 | B*27:04 | 2.8  | 50  |
|                                              |                                   |              |                                                                                           | Papua New Guinea Wosera             | A*11:01 | C*15:02 | B*40:02 | 20.5 | 95  |
|                                              |                                   |              |                                                                                           | Australia Groote Eylandt aborigines | A*11:01 | C*15:02 | B*40:02 | 7.5  | 73  |
|                                              |                                   |              |                                                                                           | Papua New Guinea Haruai             | A*11:01 | C*15:02 | B*40:02 | 7.4  | 54  |
|                                              |                                   |              |                                                                                           | Australia Yuendumu aborigines       | A*11:01 | C*15:02 | B*40:02 | 6.2  | 190 |
|                                              |                                   |              |                                                                                           | Pakistan Brahui                     | A*11    | C*15    | B*40    | 6.0  | 104 |
|                                              |                                   |              |                                                                                           | Pakistan Baloch                     | A*11    | C*15    | B*40    | 5.4  | 66  |
|                                              |                                   |              |                                                                                           | India New Delhi                     | A*11:01 | C*15:07 | B*40:06 | 4.7  | 53  |
|                                              |                                   |              |                                                                                           | Iran Baloch                         | A*11:01 | C*15:02 | B*40:06 | 3.4  | 100 |
|                                              |                                   |              |                                                                                           | Israel Druze                        | A*11:01 | C*15:02 | B*51:01 | 3.0  | 100 |
|                                              |                                   |              |                                                                                           | Pakistan Sindhi                     | A*11    | C*15    | B*40    | 2.6  | 101 |
|                                              |                                   |              |                                                                                           | New Caledonia                       | A*11:01 | C*15:02 | B*40:02 | 2.6  | 39  |
|                                              |                                   |              |                                                                                           | Australia Kimberley aborigines      | A*11:01 | C*15:02 | B*40:02 | 2.1  | 24  |
|                                              |                                   |              |                                                                                           | Papua New Guinea Goroka             | A*11:01 | C*15:02 | B*40:02 | 1.6  | 32  |
|                                              |                                   |              |                                                                                           | Taiwan Pazeh                        | A*11:01 | C*15:02 | B*40:01 | 1.1  | 55  |
| Papua New Guinea Haruai                      | A*11:01                           | C*15:02      | B*15:06                                                                                   | 0.9                                 | 54      |         |         |      |     |

**Fig. S13.** Putative Denisovan *HLA-A-C* haplotype frequencies in modern populations. Shown are the frequencies in modern humans of haplotypes carried by the Denisovan individual. Although phase could not be unambiguously determined, there are only two possible combinations (1 and 2, left column), and thus four possible haplotypes of the Denisovan *HLA-A* and *-C*. All four haplotypes exist in modern human populations. They are shown together with the specific *HLA-B* allele associated with that haplotype in each population. HF gives the allele frequency of the haplotype. Some populations shown here were too small (n<40) to be included in the distribution maps.

Figure S14  
Distribution of the Denisovan *HLA class I* alleles

**A**

| Allele                         | Population                                   | Freq. (%)                    |
|--------------------------------|----------------------------------------------|------------------------------|
| A*11                           | Papua New Guinea Madang                      | 63.6                         |
|                                | China Yunnan Province Hani                   | 61.3                         |
|                                | China Yunnan Province Wa                     | 58.4                         |
|                                | Papua New Guinea West Schrader Ranges Haruai | 55.0                         |
|                                | China Yunnan Province Bulang                 | 54.3                         |
|                                | China Yunnan Province Nu                     | 51.9                         |
|                                | China Yunnan Province Lisu                   | 51.2                         |
|                                | China Guangdong Province Meizhou Han         | 48.6                         |
|                                | China Southwest Dai                          | 41.9                         |
|                                | China Guizhou Province Miao                  | 41.8                         |
|                                | C*15                                         | Australia Kimberly Aborigine |
| Papua New Guinea Wosera Abelam |                                              | 23.2                         |
| Australia Yuendumu Aborigine   |                                              | 20.3                         |
| Pakistan Baloch                |                                              | 18.9                         |
| Pakistan Brahui                |                                              | 18.3                         |
| Iran Baloch                    |                                              | 17.7                         |
| India Kerala Hindu Namboothiri |                                              | 16.3                         |
| India Khandesh Region Pawra    |                                              | 16.0                         |
| India Kerala Hindu Nair        |                                              | 14.6                         |
| India New Delhi                |                                              | 14.3                         |
| C*12:02                        |                                              | India Khandesh Region Pawra  |
|                                | India West Bhil                              | 14.0                         |
|                                | Japan (4 pops)                               | 10.4-12.1                    |
|                                | Papua New Guinea Wosera Abelam               | 11.6                         |
|                                | Taiwan Pazeh                                 | 10.9                         |
|                                | China Yunnan Province Hani                   | 10.3                         |
|                                | Pakistan Sindhi                              | 10.2                         |
|                                | Pakistan Burusho                             | 10.2                         |
|                                | Italy Sardinia                               | 10.0                         |
|                                | Iran Tehran                                  | 9.8                          |

**B**

| Denisovan allele    | Observations (IMGT/HLA) |                      |
|---------------------|-------------------------|----------------------|
|                     | Number                  | Country              |
| <i>B*15:58-like</i> | 4                       | China (3), Korea (1) |
| <i>B*35:63</i>      | 1                       | Korea                |

**Fig. S14.** Distribution of the Denisovan *HLA class I* alleles. **(A)** Denisovan *A\*11*, *C\*15* and *C\*12:02* are common in modern humans. Ten populations with the highest allele frequencies are shown. **(B)** While Denisovan *HLA-B* alleles are absent or rare in modern humans, their closest modern genomic relatives are characteristically Asian. Number in parentheses indicate the number of observations reported in the IMGT-HLA Database (10). *B\*35:63* is a recombinant with *B\*40:01-like* exon 2 and *B\*35:01* background.

Figure S15  
Emergence of *A\*11*, *C\*15* and *C\*12:02*

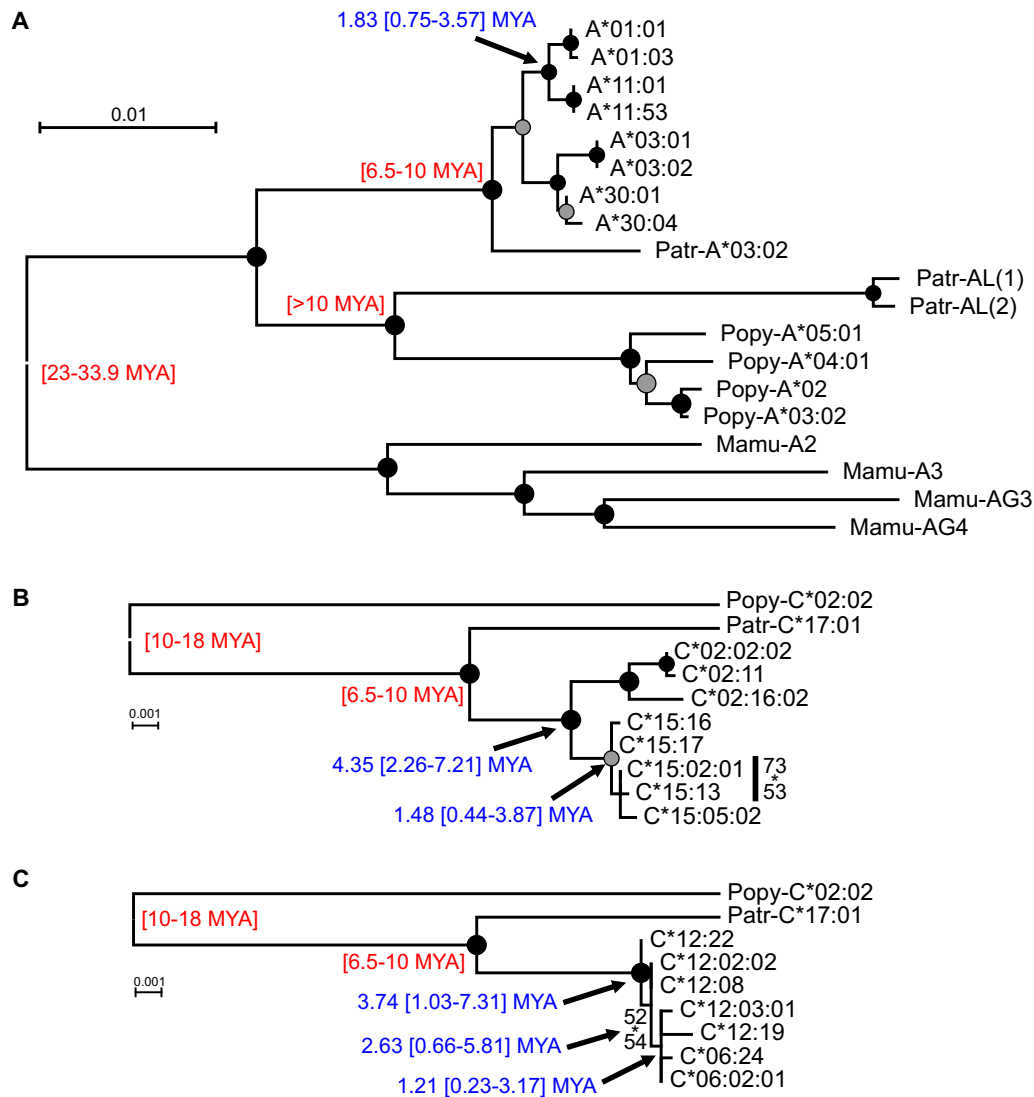

**Fig. S15.** Emergence of *A\*11*, *C\*15* and *C\*12:02*. (A-C) Divergence time estimates for the emergence of *A\*11* (A), *C\*15* (B) and *C\*12:02* (C). Phylogenetic analyses and display are as described in the legend to figure S3. At nodes, red characters indicate the fossil calibrations used for these analyses, while blue characters give the estimated age of the nodes (mean and 95% credibility interval). MYA, million years ago.



Figure S16  
Haplotype diversity of *A\*11*, *C\*15* and *C\*12:02*

**A**

|             | Region                              | Haplotypes              |                         | Pops<br>n | Max<br>HF |
|-------------|-------------------------------------|-------------------------|-------------------------|-----------|-----------|
|             |                                     | <i>HLA-A</i>            | <i>HLA-C</i>            |           |           |
| <i>A*11</i> | Asia                                | <i>A*11</i> [:01]       | <i>C*01</i> [:02]       | 12        | 7.5       |
|             |                                     | <i>A*11</i> [:01/02]    | <i>C*03</i> [:02/03/04] | 14        | 12.0      |
|             |                                     | <i>A*11</i> [:01/02]    | <i>C*04</i> [:01/03]    | 25        | 33.8      |
|             |                                     | <i>A*11</i> [:01/02]    | <i>C*07</i> [:01/02/04] | 19        | 20.2      |
|             |                                     | <i>A*11</i> [:01/02/04] | <i>C*08</i> [:01]       | 17        | 22.9      |
|             |                                     | <i>A*11</i> [:01/02]    | <i>C*12</i> [:02/03]    | 16        | 14.0      |
|             |                                     | <i>A*11</i> [:01]       | <i>C*14</i> [:02]       | 5         | 3.9       |
|             |                                     | <i>A*11</i> [:01]       | <i>C*15</i> [:02/07]    | 7         | 6.0       |
|             | Pacific<br>Islanders /<br>Australia | <i>A*11</i> [:01]       | <i>C*01</i> [:02]       | 7         | 13.9      |
|             |                                     | <i>A*11</i> [:01]       | <i>C*03</i> [:03/04]    | 6         | 9.3       |
|             |                                     | <i>A*11</i> [:01]       | <i>C*04</i> [:01/03]    | 8         | 32.5      |
|             |                                     | <i>A*11</i> [:01]       | <i>C*07</i> [:01/02]    | 5         | 14.8      |
|             |                                     | <i>A*11</i> [:01]       | <i>C*08</i> [:01]       | 2         | 2.5       |
|             |                                     | <i>A*11</i> [:01]       | <i>C*12</i> [:02/03]    | 4         | 5.6       |
|             | Europe                              | <i>A*11</i> [:01]       | <i>C*15</i> [:02]       | 4         | 20.5      |
|             |                                     | <i>A*11</i> [:01]       | <i>C*03</i> [:03/04]    | 2         | 2.2       |
|             |                                     | <i>A*11</i> [:01]       | <i>C*04</i> [:01]       | 3         | 4.0       |
|             |                                     | <i>A*11</i> [:01]       | <i>C*05</i> [:01]       | 1         | 0.4       |
|             | N.Africa                            | <i>A*11</i> [:01]       | <i>C*07</i> [:01/02]    | 1         | 2.1       |
|             |                                     | <i>A*11</i> [:01]       | <i>C*01</i>             | 1         | 2.0       |

**B**

|                   | Region                          | Haplotypes              |                         | Pops<br>n | Max<br>HF |
|-------------------|---------------------------------|-------------------------|-------------------------|-----------|-----------|
|                   |                                 | <i>HLA-C</i>            | <i>HLA-B</i>            |           |           |
| <i>C*15</i>       | Asia/Americas                   | <i>C*15</i> [:05]       | <i>B*07</i> [:02/05]    | 3         | 4.7       |
|                   |                                 | <i>C*15</i> [:02/03]    | <i>B*15</i> [:01/04]    | 3         | 6.0       |
|                   |                                 | <i>C*15</i> [:02]       | <i>B*27</i> [:07]       | 1         | 2.5       |
|                   |                                 | <i>C*15</i> [:04/05]    | <i>B*35</i> [:01]       | 2         | 1.5       |
|                   |                                 | <i>C*15</i> [:02/07]    | <i>B*40</i> [:01/02/06] | 13        | 11.1      |
|                   |                                 | <i>C*15</i> [:05]       | <i>B*44</i> [:02]       | 1         | 1.0       |
|                   |                                 | <i>C*15</i> [:02/03/05] | <i>B*51</i> [:01/04]    | 12        | 9.5       |
|                   |                                 | <i>C*15</i> [:03]       | <i>B*52</i> [:01]       | 1         | 12.8      |
|                   |                                 | <i>C*15</i> [:02]       | <i>B*56</i> [:01]       | 3         | 5.0       |
|                   | Pacific Islanders/<br>Australia | <i>C*15</i> [:02]       | <i>B*15</i> [:06/25]    | 2         | 3.2       |
|                   |                                 | <i>C*15</i> [:02/05/07] | <i>B*40</i> [:02/08/12] | 6         | 20.5      |
|                   | Europe                          | <i>C*15</i> [:02]       | <i>B*51</i> [:01]       | 3         | 2.5       |
|                   | N. Africa                       | <i>C*15</i> [:02]       | <i>B*51</i> [:01]       | 1         | 2.5       |
|                   | African American                | <i>C*15</i> [:05]       | <i>B*07</i> [:02]       | 1         | 1.1       |
| <i>C*15</i> [:02] |                                 | <i>B*51</i> [:01]       | 1                       | 0.4       |           |
| <i>C*12:02</i>    | Asia                            | <i>C*12</i> [:02]       | <i>B*15</i> [:07/25]    | 3         | 9.0       |
|                   |                                 | <i>C*12</i> [:02]       | <i>B*27</i> [:04]       | 9         | 10.9      |
|                   |                                 | <i>C*12</i> [:02]       | <i>B*40</i> [:02/06]    | 2         | 4.9       |
|                   |                                 | <i>C*12</i> [:02]       | <i>B*44</i> [:04]       | 1         | 1.4       |
|                   |                                 | <i>C*12</i> [:02]       | <i>B*52</i> [:01]       | 7         | 10.7      |
|                   |                                 | <i>C*12</i> [:02]       | <i>B*53</i> [:03]       | 1         | 5.8       |
|                   |                                 | <i>C*12</i> [:02]       | <i>B*56</i> [:01]       | 1         | 1.0       |
|                   | Pacific Islanders/<br>Australia | <i>C*12</i> [:02]       | <i>B*27</i> [:04]       | 3         | 5.6       |
|                   |                                 | <i>C*12</i> [:02]       | <i>B*39</i> [:01]       | 1         | 1.1       |
|                   | N. Africa                       | <i>C*12</i> [:02]       | <i>B*52</i> [:01]       | 1         | 2.0       |
| African American  | <i>C*12</i> [:02]               | <i>B*52</i> [:01]       | 1                       | 0.1       |           |

**Fig. S16.** Haplotype diversity of *A\*11*, *C\*15* and *C\*12:02*. Shown are all of the haplotypes in modern populations that contain one of the three *HLA* alleles, *A\*11*, *C\*15* or *C\*12:02*, identified in the Denisovan individual (**A**) *HLA-A/C*. (**B**) *HLA-B/C*: *C\*15* and *C\*12:02* are found at low frequencies in Africa but because their haplotype frequencies are <1%, their haplotype structures in Africa are not reported in databases. To investigate *HLA-B/C* haplotype structures for these two alleles in Africa, we used data from a study of ~2,400 African-American donors, in which all the haplotypes were defined and reported (62). Allele subtypes listed in brackets were all observed.

Figure S17  
*HLA-A, B, and C* alleles of three Neandertals

| Individuals | Neandertal <i>HLA class I</i> loci |       |                        |       | Most closely related modern allele group |
|-------------|------------------------------------|-------|------------------------|-------|------------------------------------------|
|             | Name                               | Reads | Specific gene coverage |       |                                          |
|             |                                    |       | Allele #               | Reads | Allele(s)                                |
| SLVi33.16   | <i>HLA-A</i>                       | 49    | 1                      | 25    | A*02                                     |
|             |                                    |       | 2                      | 5     | A*26/*66                                 |
|             | <i>HLA-B</i>                       | 57    | 1                      | 14    | B*07/*48                                 |
|             |                                    |       | 2                      | 21    | B*51/*52/*78                             |
|             | <i>HLA-C</i>                       | 75    | 1                      | 30    | C*07:02                                  |
|             |                                    |       | 2                      | 19    | C*16:02                                  |
| SLVi33.25   | <i>HLA-A</i>                       | 35    | 1                      | 7     | A*02                                     |
|             |                                    |       | 2                      | 8     | A*26/*66                                 |
|             | <i>HLA-B</i>                       | 28    | 1                      | 5     | B*07/*48                                 |
|             |                                    |       | 2                      | 10    | B*51/*53                                 |
|             | <i>HLA-C</i>                       | 22    | 1                      | 10    | C*07:02                                  |
|             |                                    |       | 2                      | 5     | C*16                                     |
| SLVi33.26   | <i>HLA-A</i>                       | 28    | 1                      | 6     | A*02                                     |
|             |                                    |       | 2                      | 3     | A*26/*31/*34/*66                         |
|             | <i>HLA-B</i>                       | 45    | 1                      | 10    | B*07/*48                                 |
|             |                                    |       | 2                      | 12    | B*51/*52/*78                             |
|             | <i>HLA-C</i>                       | 35    | 1                      | 12    | C*07:02                                  |
|             |                                    |       | 2                      | 7     | C*16                                     |

**Fig. S17.** *HLA-A, B, and C* alleles of three Neandertals. *HLA-A, B, and C* types were investigated for each of the three Neandertal individuals whose genome was sequenced (3). For each individual a precise type was obtained for two *HLA-C* alleles and one *HLA-A* allele. For the other alleles, the type is given as a string, listing all possible types.

Figure S18

Modern populations with two high-frequency *HLA-C* alleles

| Population                                      |     | <i>HLA-C</i> alleles |           | p of having three individuals with the same two alleles |               |
|-------------------------------------------------|-----|----------------------|-----------|---------------------------------------------------------|---------------|
| Name                                            | n   | Name                 | Frequency | Two related                                             | All unrelated |
| India Kerala Kattunaikka                        | 17  | C*04                 | 0.412     | 0.0475                                                  | 0.0391        |
|                                                 |     | C*14                 | 0.412     |                                                         |               |
| Central African Republic Mbenzele Pygmy         | 36  | C*02                 | 0.520     | 0.0365                                                  | 0.0272        |
|                                                 |     | C*07                 | 0.289     |                                                         |               |
| India Kerala Paniya                             | 10  | C*12                 | 0.300     | 0.0360                                                  | 0.0270        |
|                                                 |     | C*14                 | 0.500     |                                                         |               |
| Venezuela Perja Mountain Bari                   | 55  | C*03                 | 0.409     | 0.0219                                                  | 0.0152        |
|                                                 |     | C*07                 | 0.303     |                                                         |               |
| Mexico Oaxaca Mixtec                            | 103 | C*04                 | 0.373     | 0.0218                                                  | 0.0153        |
|                                                 |     | C*07                 | 0.333     |                                                         |               |
| India Kerala Kuruma                             | 15  | C*04                 | 0.300     | 0.0202                                                  | 0.0138        |
|                                                 |     | C*14                 | 0.400     |                                                         |               |
| Papua New Guinea Eastern Highlands Goroka Asaro | 57  | C*01                 | 0.302     | 0.0200                                                  | 0.0137        |
|                                                 |     | C*04                 | 0.396     |                                                         |               |
| Taiwan Tao                                      | 50  | C*03                 | 0.290     | 0.0198                                                  | 0.0134        |
|                                                 |     | C*04                 | 0.410     |                                                         |               |
| Mexico Oaxaca Zapotec                           | 90  | C*04                 | 0.306     | 0.0187                                                  | 0.0127        |
|                                                 |     | C*07                 | 0.381     |                                                         |               |
| Taiwan Tsou                                     | 51  | C*03                 | 0.402     | 0.0165                                                  | 0.0108        |
|                                                 |     | C*07                 | 0.275     |                                                         |               |
| Australia Kimberly Aborigine                    | 41  | C*01                 | 0.375     | 0.0152                                                  | 0.0099        |
|                                                 |     | C*15                 | 0.286     |                                                         |               |
| Malaysia Negeri Sembilan Minangkabau            | 34  | C*04                 | 0.340     | 0.0144                                                  | 0.0094        |
|                                                 |     | C*07                 | 0.310     |                                                         |               |
| Papua New Guinea Madang                         | 65  | C*04                 | 0.345     | 0.0140                                                  | 0.0090        |
|                                                 |     | C*07                 | 0.302     |                                                         |               |
| Taiwan Taroko                                   | 55  | C*03                 | 0.327     | 0.0139                                                  | 0.0090        |
|                                                 |     | C*07                 | 0.318     |                                                         |               |
| Mexico Oaxaca Mixe                              | 55  | C*04                 | 0.378     | 0.0139                                                  | 0.0088        |
|                                                 |     | C*07                 | 0.273     |                                                         |               |
| Australia Groote Eylandt Aborigine              | 75  | C*01                 | 0.267     | 0.0131                                                  | 0.0082        |
|                                                 |     | C*04                 | 0.377     |                                                         |               |
| Cameroon Baka Pygmy                             | 10  | C*02                 | 0.250     | 0.0130                                                  | 0.0080        |
|                                                 |     | C*07                 | 0.400     |                                                         |               |
| Taiwan Puyuma                                   | 50  | C*03                 | 0.320     | 0.0114                                                  | 0.0071        |
|                                                 |     | C*08                 | 0.300     |                                                         |               |
| Malaysia Kelantan                               | 25  | C*04                 | 0.280     | 0.0096                                                  | 0.0058        |
|                                                 |     | C*07                 | 0.320     |                                                         |               |
| India Kerala Malapandaram                       | 10  | C*03                 | 0.350     | 0.0092                                                  | 0.0054        |
|                                                 |     | C*14                 | 0.250     |                                                         |               |
| Sudan East Rashaida                             | 27  | C*06                 | 0.280     | 0.0086                                                  | 0.0050        |
|                                                 |     | C*07                 | 0.306     |                                                         |               |
| Norway Sami                                     | 200 | C*03                 | 0.251     | 0.0080                                                  | 0.0045        |
|                                                 |     | C*07                 | 0.330     |                                                         |               |
| Taiwan Atayal                                   | 106 | C*03                 | 0.283     | 0.0076                                                  | 0.0043        |
|                                                 |     | C*07                 | 0.288     |                                                         |               |
| Sudan South Nuba                                | 46  | C*04                 | 0.293     | 0.0076                                                  | 0.0043        |
|                                                 |     | C*07                 | 0.278     |                                                         |               |

**Fig. S18.** Modern populations with two high-frequency *HLA-C* alleles. For modern human populations, the probability of three randomly selected, unrelated individuals having the same two *HLA-C* alleles is small. Displayed are the 24 populations (out of ~250) with the highest probabilities of producing three individuals with the same two *HLA-C* allotypes as they have two high frequency *HLA-C* alleles. Of these the top 10 have probabilities of 1-5%. Even if two of the three individuals are maternally-related (3), this number would only increase from 10 to 18. The probability calculation was made as follows: one individual randomly selected from a population having two alleles of frequencies  $x$  and  $y$  will have a probability  $p=2*(x*y)$  to have one copy of each allele. The probability of three unrelated individuals having the same allelic content is  $(2*(x*y))^3$ .

Figure S19  
Putative Neandertal *HLA-A-C* haplotype frequencies in modern populations

| <i>HLA-A-C</i> haplotype |              | Population                 | HF                | n     |
|--------------------------|--------------|----------------------------|-------------------|-------|
| <i>HLA-A</i>             | <i>HLA-C</i> |                            |                   |       |
| A*02                     | C*07:02      | Venezuela Yucpa            | 26.9              | 73    |
|                          |              | USA Canoncito Navajo       | 13.1              | 41    |
|                          |              | China Yunnan Lisu          | 10.4              | 111   |
|                          |              | Ireland Northern           | 5.1               | 1,000 |
|                          |              | Philippines Ivatan         | 4.7               | 50    |
|                          |              | China Yunnan Bulang        | 4.3               | 116   |
|                          |              | China Yunnan Nu            | 4.1               | 107   |
|                          |              | Finn                       | 3.9               | 90    |
|                          |              | China Guizhou Bouyei       | 3.3               | 109   |
|                          |              | China Yunnan Hani pop 2    | 3.0               | 150   |
|                          |              | Russia Bering Island Aleut | 2.8               | 85    |
|                          |              | Taiwan Pazeh               | 2.7               | 55    |
|                          |              | China Southwest Dai        | 2.6               | 124   |
|                          |              | Taiwan Saisiat             | 2.6               | 51    |
|                          |              | Taiwan Paiwan              | 2.0               | 51    |
|                          |              | Brazil Guarani-Nandewa     | 2.0               | 51    |
|                          |              | Georgian                   | 1.9               | 104   |
|                          |              | India New Delhi            | 1.9               | 53    |
|                          |              | Taiwan Siraya              | 1.8               | 51    |
|                          |              | Taiwan Ami                 | 1.5               | 98    |
|                          |              | Vietnam Hanoi Kinh pop 2   | 1.5               | 170   |
|                          |              | Czech                      | 1.4               | 104   |
|                          |              | Russia Tuva                | 1.4               | 166   |
|                          |              | Poland                     | 1.3               | 200   |
|                          |              | Australia Yuendumu         | 1.2               | 190   |
|                          |              | Zambian                    | 1.2               | 43    |
| Iran Baloch              | 1.1          | 100                        |                   |       |
| American Samoa           | 1.0          | 50                         |                   |       |
| Taiwan Puyuma            | 1.0          | 50                         |                   |       |
| Taiwan Rukai             | 1.0          | 50                         |                   |       |
| A*26                     | C*16:02      | Europe, Asia               | Rare <sup>#</sup> |       |
| A*02                     | C*16:02      | Pakistan Pathan            | 3.4               | 100   |
|                          |              | Georgian                   | 1.4               | 104   |
| A*26                     | C*07:02      | Taiwan Taroko              | 10.8              | 55    |
|                          |              | Pakistan Burusho           | 6.0               | 92    |
|                          |              | Taiwan Rukai               | 5.4               | 50    |
|                          |              | Taiwan Bunun               | 5.3               | 101   |
|                          |              | Pakistan Sindhi            | 5.0               | 101   |
|                          |              | Taiwan Atayal              | 4.3               | 106   |
|                          |              | Pakistan Pathan            | 3.8               | 100   |
|                          |              | India New Delhi            | 3.8               | 53    |
|                          |              | Taiwan Siraya              | 2.0               | 51    |
|                          |              | Taiwan Saisiat             | 1.2               | 51    |
|                          |              | Iran Baloch                | 1.1               | 100   |
|                          |              | Filipino                   | 1.1               | 94    |
|                          |              | American Samoa             | 1.0               | 50    |

**Fig. S19.** Putative Neandertal *HLA-A-C* haplotype frequencies in modern populations. The two *HLA-A* and two *HLA-C* alleles of the three Neandertals can form four possible haplotypes: their frequencies (HF) in modern human populations are shown. #, haplotype was observed in large cohorts of registry donors (62) but not in anthropology studies with HF>1%.

Figure S20

Allele frequency distributions for *HLA-A\*02* and *A\*26/\*66*

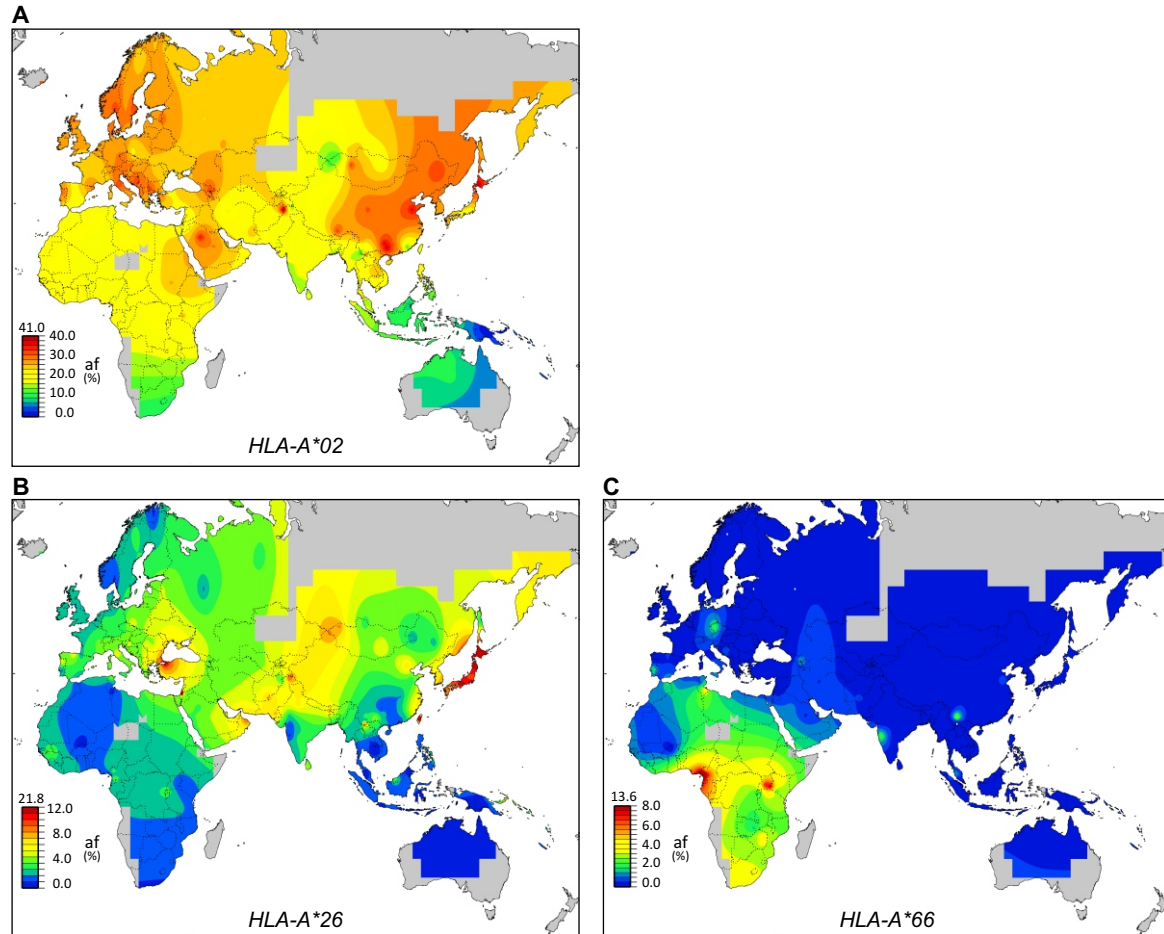

**Fig. S20.** Allele frequency distributions for *HLA-A\*02* and *A\*26/\*66*. (A-C) In addition to *A\*02*, a common allele group worldwide (A), the *HLA-A* genotype of one Neandertal allele could not be determined precisely enough for careful distribution analyses: the genotype of this *HLA-A* allele was narrowed down to two possibilities (*A\*26/\*66*) but while *A\*26* is most common in Eurasia (B), *A\*66* is more common in Africa (C).

**Figure S21**  
**Distribution of Neandertal *HLA class I* alleles**

| Allele        | Population                               | Freq. (%) |
|---------------|------------------------------------------|-----------|
| A*26          | Taiwan Aborigines (3 pops)               | 14-21.8   |
|               | Japan (8 pops)                           | 10.8-19   |
|               | Israel Ashkenazi Jews                    | 15.4      |
|               | Turkey                                   | 13.5      |
|               | Pakistan Baloch                          | 10.3      |
|               | Oman                                     | 10.2      |
|               | Pakistan Burusho                         | 9.8       |
|               | China Yunnan Province Jinuo              | 9.6       |
|               | Mongolia Hoton                           | 9.4       |
|               | Mongolia Tarialan Khoton                 | 9.4       |
| B*07:02/03/06 | Sweden Northern Sami                     | 19.0      |
|               | Sweden Southern Sami                     | 18.6      |
|               | Ireland Northern                         | 17.3      |
|               | England North West                       | 15.3      |
|               | Finland                                  | 14.4      |
|               | Austria                                  | 12.9      |
|               | Poland                                   | 12.1      |
|               | Russia Bering Island Aleut               | 10.0      |
|               | Croatia                                  | 9.7       |
|               | Azores Santa Maria and Sao Miguel        | 9.0       |
| C*07:02       | Venezuela Sierra de Perija Yucpa         | 71.4      |
|               | Taiwan Saisiat                           | 66.7      |
|               | Papua New Guinea East New Britain Rabaul | 57.1      |
|               | Mexico Oaxaca Mixtec                     | 33.3      |
|               | China Yunnan Province Lisu               | 32.9      |
|               | Taiwan Taroko                            | 31.8      |
|               | China Yunnan Province Nu                 | 30.7      |
|               | Venezuela Perja Mountain Bari            | 30.3      |
|               | Papua New Guinea Madang                  | 30.2      |
|               | Taiwan Atayal                            | 28.8      |
| A*66          | Cameroon Bakola Pygmy                    | 14.5      |
|               | Kenya Luo                                | 7.7       |
|               | Uganda Kampala pop 2                     | 7.5       |
|               | Cameroon Yaounde                         | 7.1       |
|               | Cameroon Beti                            | 5.5       |
|               | Kenya Nandi                              | 5.4       |
|               | Cameroon Bamileke                        | 5.1       |
|               | Tunisia Ghannouch                        | 4.3       |
|               | Zimbabwe Harare Shona                    | 4.2       |
|               | India West Bhil                          | 4.0       |
| B*51:01/08    | Bulgaria                                 | 20.9      |
|               | Japan Hokkaido Ainu                      | 19.0      |
|               | Oman                                     | 17.8      |
|               | China Tibet Region Tibetan               | 16.8      |
|               | Georgia Tibilisi                         | 16.7      |
|               | China North Han                          | 15.8      |
|               | Georgia Svaneti Region Svan              | 15.6      |
|               | India Tamil Nadu Nadar                   | 15.6      |
|               | Saudi Arabia Guraiait and Hail           | 15.6      |
|               | India Andhra Pradesh Golla               | 14.4      |
| C*16:02       | Pakistan Pathan                          | 5.5       |
|               | Iran Tehran                              | 4.9       |
|               | Georgia Tibilisi                         | 4.2       |
|               | Spain Andalusia                          | 3.7       |
|               | Tunisia                                  | 3.0       |
|               | Pakistan Kalash                          | 2.9       |
|               | Iran Baloch                              | 2.6       |
|               | India Delhi                              | 2.5       |
|               | Italy North                              | 2.3       |
|               | Jordan Amman                             | 2.1       |

**Fig. S21.** Distribution of Neandertal *HLA class I* alleles. Neandertal alleles are common in modern humans. For each assigned allele or candidate allele the 10 populations with the highest allele frequencies are given.

Figure S22

Haplotype diversity of *B\*07:02/03/06*, *B\*51:01/08*, *C\*07:02* and *C\*16:02*

|                      | Region                      | Haplotypes       |                                | Pops<br>n | Max<br>HF |
|----------------------|-----------------------------|------------------|--------------------------------|-----------|-----------|
|                      |                             | <i>HLA-C</i>     | <i>HLA-B</i>                   |           |           |
| <i>B*51:01/08</i>    | Asia / Americas             | C*03[:04]        | <b>B*51[:01]</b>               | 2         | 9.0       |
|                      |                             | C*04[:03]        | <b>B*51[:01]</b>               | 1         | 2.0       |
|                      |                             | C*07[:01]        | <b>B*51[:01]</b>               | 1         | 2.8       |
|                      |                             | C*14[:02]        | <b>B*51[:01]</b>               | 12        | 9.1       |
|                      |                             | C*15[:02/03/05]  | <b>B*51[:01]</b>               | 10        | 4.9       |
|                      |                             | C*16[:02]        | <b>B*51[:01/08]</b>            | 2         | 1.4       |
|                      | Europe                      | C*01[:02]        | <b>B*51[:01]</b>               | 1         | 2.8       |
|                      |                             | C*14[:02]        | <b>B*51[:01]</b>               | 1         | 1.8       |
|                      |                             | C*15[:02]        | <b>B*51[:01]</b>               | 2         | 1.1       |
|                      | N.Africa                    | C*15[:02]        | <b>B*51[:01]</b>               | 1         | 2.5       |
| C*16[:02]            |                             | <b>B*51[:01]</b> | 1                              | 2.0       |           |
| Sub-Saharan Africa   | C*16[:01/02]                | <b>B*51[:01]</b> | 4                              | 4.0       |           |
| <i>B*07:02/03/06</i> | Asia / Americas<br>/Oceania | C*04[:01]        | <b>B*07[:02]</b>               | 1         | 1.6       |
|                      |                             | C*07[:02/04]     | <b>B*07[:02]</b>               | 16        | 6.5       |
|                      |                             | C*15[:05]        | <b>B*07[:02]</b>               | 1         | 2.0       |
|                      | Europe                      | C*07[:02]        | <b>B*07[:02]</b>               | 4         | 17.0      |
| Sub-Saharan Africa   | C*07[:01/02]                | <b>B*07[:02]</b> | 8                              | 4.3       |           |
| <i>C*07:02</i>       | Asia / Americas<br>/Oceania | <b>C*07[:02]</b> | B*07[:02/05]                   | 19        | 6.5       |
|                      |                             | <b>C*07[:02]</b> | B*08[:01]                      | 6         | 14.8      |
|                      |                             | <b>C*07[:02]</b> | B*13[:01]                      | 3         | 1.6       |
|                      |                             | <b>C*07[:02]</b> | B*15[:03/25/32/35/36]          | 7         | 5.9       |
|                      |                             | <b>C*07[:02]</b> | B*18[:01]                      | 1         | 0.9       |
|                      |                             | <b>C*07[:02]</b> | B*27[:04]                      | 1         | 0.9       |
|                      |                             | <b>C*07[:02]</b> | B*35[:01]                      | 2         | 6.0       |
|                      |                             | <b>C*07[:02]</b> | B*38[:01/02]                   | 14        | 14.9      |
|                      |                             | <b>C*07[:02]</b> | B*39[:01/02/03/05/06/08/09/11] | 26        | 71.1      |
|                      |                             | <b>C*07[:02]</b> | B*40[:01/02/06]                | 20        | 11.8      |
|                      |                             | <b>C*07[:02]</b> | B*46[:01]                      | 3         | 1.8       |
|                      |                             | <b>C*07[:02]</b> | B*48[:01/03]                   | 2         | 1.5       |
|                      |                             | <b>C*07[:02]</b> | B*52[:01]                      | 4         | 17.6      |
|                      |                             | <b>C*07[:02]</b> | B*55[:02]                      | 2         | 3.0       |
|                      | <b>C*07[:02]</b>            | B*56[:01/02]     | 7                              | 22.2      |           |
|                      | <b>C*07[:02]</b>            | B*58[:01]        | 2                              | 2.7       |           |
|                      | <b>C*07[:02]</b>            | B*67[:01]        | 1                              | 1.1       |           |
|                      | Europe                      | <b>C*07[:02]</b> | B*07[:02]                      | 4         | 17.0      |
|                      |                             | <b>C*07[:02]</b> | B*39[:01]                      | 1         | 1.1       |
|                      | N.Africa                    | <b>C*07[:02]</b> | B*08[:01]                      | 1         | 2.0       |
| Sub-Saharan Africa   | <b>C*07[:02]</b>            | B*07[:02]        | 8                              | 4.3       |           |
|                      | <b>C*07[:02]</b>            | B*08[:01]        | 2                              | 1.6       |           |
| <i>C*16:02</i>       | Asia                        | <b>C*16[:02]</b> | B*40[:06]                      | 1         | 1.1       |
|                      |                             | <b>C*16[:02]</b> | B*51[:01/08]                   | 5         | 5.9       |
|                      | N.Africa                    | <b>C*16[:02]</b> | B*51[:01]                      | 1         | 2.0       |
|                      | Sub-Saharan Africa          | <b>C*16[:02]</b> | B*51[:01]                      | 1         | 1.3       |

**Fig. S22.** Haplotype diversity of *B\*07:02/03/06*, *B\*51:01/08*, *C\*07:02*, and *C\*16:02*. Diversity of the *HLA-B-C* haplotypes carrying *B\*07:02/03/06*, *B\*51:01/08*, *C\*07:02*, and *C\*16:02* in modern populations. Allele subtypes listed in brackets were all observed.

Figure S23

Enhanced *HLA class I* LD decay significantly correlates with archaic ancestry

A

| <i>HLA-B</i>                                      |                                    | Population |          |         |          |
|---------------------------------------------------|------------------------------------|------------|----------|---------|----------|
|                                                   |                                    | African    | European | Chinese | Japanese |
| Distinct alleles                                  |                                    | 27         | 29       | 28      | 22       |
| Allele-specific haplotypes with enhanced LD decay | Number                             | 3          | 4        | 3       | 6        |
|                                                   | Defining allele name ( <i>B*</i> ) | ---        |          |         | 15:01    |
|                                                   |                                    |            | 18:01    | ---     | ---      |
|                                                   |                                    | 35:01      |          |         |          |
|                                                   |                                    | ---        | 37:01    |         | ---      |
|                                                   |                                    | ---        | 39:05    | ---     | ---      |
|                                                   |                                    | ---        |          |         | 40:02    |
|                                                   |                                    | ---        | ---      |         | 40:06    |
|                                                   |                                    |            | 51:01    | 51:01   | 51:01    |
|                                                   |                                    | 53:01      | ---      | ---     | ---      |
|                                                   |                                    | ---        | ---      |         | 54:01    |
|                                                   |                                    |            |          | 56:01   |          |
|                                                   |                                    | ---        | ---      |         | 59:01    |
|                                                   |                                    | ---        | ---      | 67:01   |          |
| 81:01                                             | ---                                |            | ---      |         |          |

B

| <i>HLA-C</i>                                      |                                    | Population |          |         |          |
|---------------------------------------------------|------------------------------------|------------|----------|---------|----------|
|                                                   |                                    | African    | European | Chinese | Japanese |
| Distinct alleles                                  |                                    | 16         | 17       | 13      | 15       |
| Allele-specific haplotypes with enhanced LD decay | Number                             | 5          | 6        | 3       | 6        |
|                                                   | Defining allele name ( <i>C*</i> ) |            | 01:02    | 01:02   | 01:02    |
|                                                   |                                    | 02:02      | 02:02    | ---     | ---      |
|                                                   |                                    | 03:02      | ---      |         |          |
|                                                   |                                    | ---        | 03:03    |         | 03:03    |
|                                                   |                                    | ---        |          |         | 03:04    |
|                                                   |                                    | 04:01      |          |         |          |
|                                                   |                                    | 07:01      |          | ---     | ---      |
|                                                   |                                    |            |          | 07:02   | 07:02    |
|                                                   |                                    | ---        | 07:04    |         |          |
|                                                   |                                    | ---        |          | 08:01   | 08:01    |
|                                                   |                                    |            | 14:02    |         | 14:02    |
|                                                   |                                    | ---        | 15:02    |         |          |
|                                                   |                                    | 16:01      |          | ---     | ---      |

**Fig. S23.** Enhanced *HLA class I* LD decay significantly correlates with archaic ancestry. (A-B) Shown for each HapMap population are (top row) the number of distinct *HLA-B* or *HLA-C* alleles present and (second row) the number exhibiting enhanced LD decay (all allele-defining SNPs ( $r^2 > 0.2$ ) are within 500kb of *HLA-A* (31)). The allele names are listed (rows 3-14) and colored green when observed in archaic humans (Figs 2-3) or associated with archaic-origin haplotypes (fig. S25). *HLA-A* is shown in Fig. 4. ---, absent in the population.



Figure S24

*HLA-C* alleles linked to *B\*73* when *C\*15* is absent

| <i>HLA-C-B</i><br>haplotype | Frequency: all haplotypes<br>± SE (%)<br>(n=92) | Frequency: <i>B*73</i> haplotypes<br>± SE (%)<br>(n=47) |
|-----------------------------|-------------------------------------------------|---------------------------------------------------------|
| <i>C*12:02 - B*73:01</i>    | 14.9±3.7                                        | 29.2±7.3                                                |
| <i>C*02:02 - B*73:01</i>    | 9.8±3.1                                         | 19.1±6.1                                                |
| <i>C*06:02 - B*73:01</i>    | 5.4±2.4                                         | 10.6±4.6                                                |
| <i>C*16:01 - B*73:01</i>    | 3.3±1.9                                         | 6.4±3.6                                                 |
| <i>C*04:01 - B*73:01</i>    | 3.1±1.8                                         | 6.1±3.6                                                 |
| <i>C*07:01 - B*73:01</i>    | 2.8±1.7                                         | 5.4±3.3                                                 |

**Fig. S24.** *HLA-C* alleles linked to *B\*73* when *C\*15* is absent. *HLA-C-B* haplotype structures were determined for 46 *B\*73*<sup>+</sup> individuals lacking *C\*15* (fig. S7), and *B\*73* haplotypes observed at least twice are listed with their estimated frequency (n=92, all haplotypes; n=47, *B\*73* haplotypes only). SE, standard error.

## Figure S25

### Alleles associated with Denisovan/Neandertal-like haplotypes

| Main haplotype                                                | Archaic human-like haplotypes |                           |                           |
|---------------------------------------------------------------|-------------------------------|---------------------------|---------------------------|
| 2-locus haplotype                                             | Denisovan <i>HLA-A-C</i>      | Neandertal <i>HLA-A-B</i> | Neandertal <i>HLA-A-C</i> |
| Third locus                                                   | <i>HLA-B</i>                  | <i>HLA-C</i>              | <i>HLA-B</i>              |
| Alleles of the third locus present on modern human haplotypes | *07:02                        | *01:02                    | *07:02/05                 |
|                                                               | *15:01/06/07/25               | *02:02                    | *08:01                    |
|                                                               | *27:04                        | *04:01                    | *15:01/03/25              |
|                                                               | *39:01                        | *07:01/02                 | *18:01                    |
|                                                               | *40:01/02/06/08               | *14:02                    | *35:01                    |
|                                                               | *44:02                        | *15:02/03/05              | *38:01/02                 |
|                                                               | *51:01/04                     | *16:01/02                 | *39:01/03/05/06           |
|                                                               | *52:01                        |                           | *40:01/06                 |
|                                                               | *56:01                        |                           | *48:01                    |
|                                                               |                               |                           | *51:01                    |
|                                                               |                               |                           | *52:01                    |
|                                                               |                               |                           | *56:01                    |
|                                                               |                               | *67:01                    |                           |

**Fig. S25.** Alleles associated with Denisovan/Neandertal-like haplotypes. Shown is each category of two-locus archaic haplotypes we inferred, together with the allele at the third locus that is present on the equivalent modern-human haplotype. Every *HLA-B* allele that is found in modern humans on at least one of the four Denisovan-like *HLA-A-C* haplotypes is shown in column 3. The third and fourth columns give the *HLA-C* and *HLA-B* alleles found on the Neandertal-like *HLA-A-B* and *HLA-A-C* haplotypes, respectively.

Figure S26

Population recombination rates for the *HLA class I* region

| Genomic region             | Population | $\rho$ (*10 <sup>4</sup> ) |      |
|----------------------------|------------|----------------------------|------|
|                            |            | Mean                       | SD   |
| <i>HLA-A-B</i><br>(~1.4Mb) | African    | 1.00                       | 0.06 |
|                            | European   | 0.70                       | 0.06 |
|                            | Japanese   | 1.21                       | 0.13 |
|                            | Chinese    | 1.33                       | 0.13 |
| <i>HLA-A-C</i><br>(~1.3Mb) | African    | 0.96                       | 0.08 |
|                            | European   | 0.70                       | 0.07 |
|                            | Japanese   | 1.14                       | 0.11 |
|                            | Chinese    | 1.18                       | 0.12 |
| <i>HLA-C-B</i><br>(~85kb)  | African    | 1.54                       | 0.31 |
|                            | European   | 2.13                       | 0.48 |
|                            | Japanese   | 3.12                       | 0.64 |
|                            | Chinese    | 4.88                       | 1.00 |

**Fig. S26.** Population recombination rates for the *HLA class I* region. Population recombination rates ( $\rho$ ) for four populations and three *HLA class I* intervals.
